# Supplementary material
Source: bioRxiv or medRxiv preprint supplement (https://medrxiv.org/highwire/filestream/89931/field_highwire_adjunct_files/24/2020.07.16.20153437-6.pdf)

# Naive CD4 T

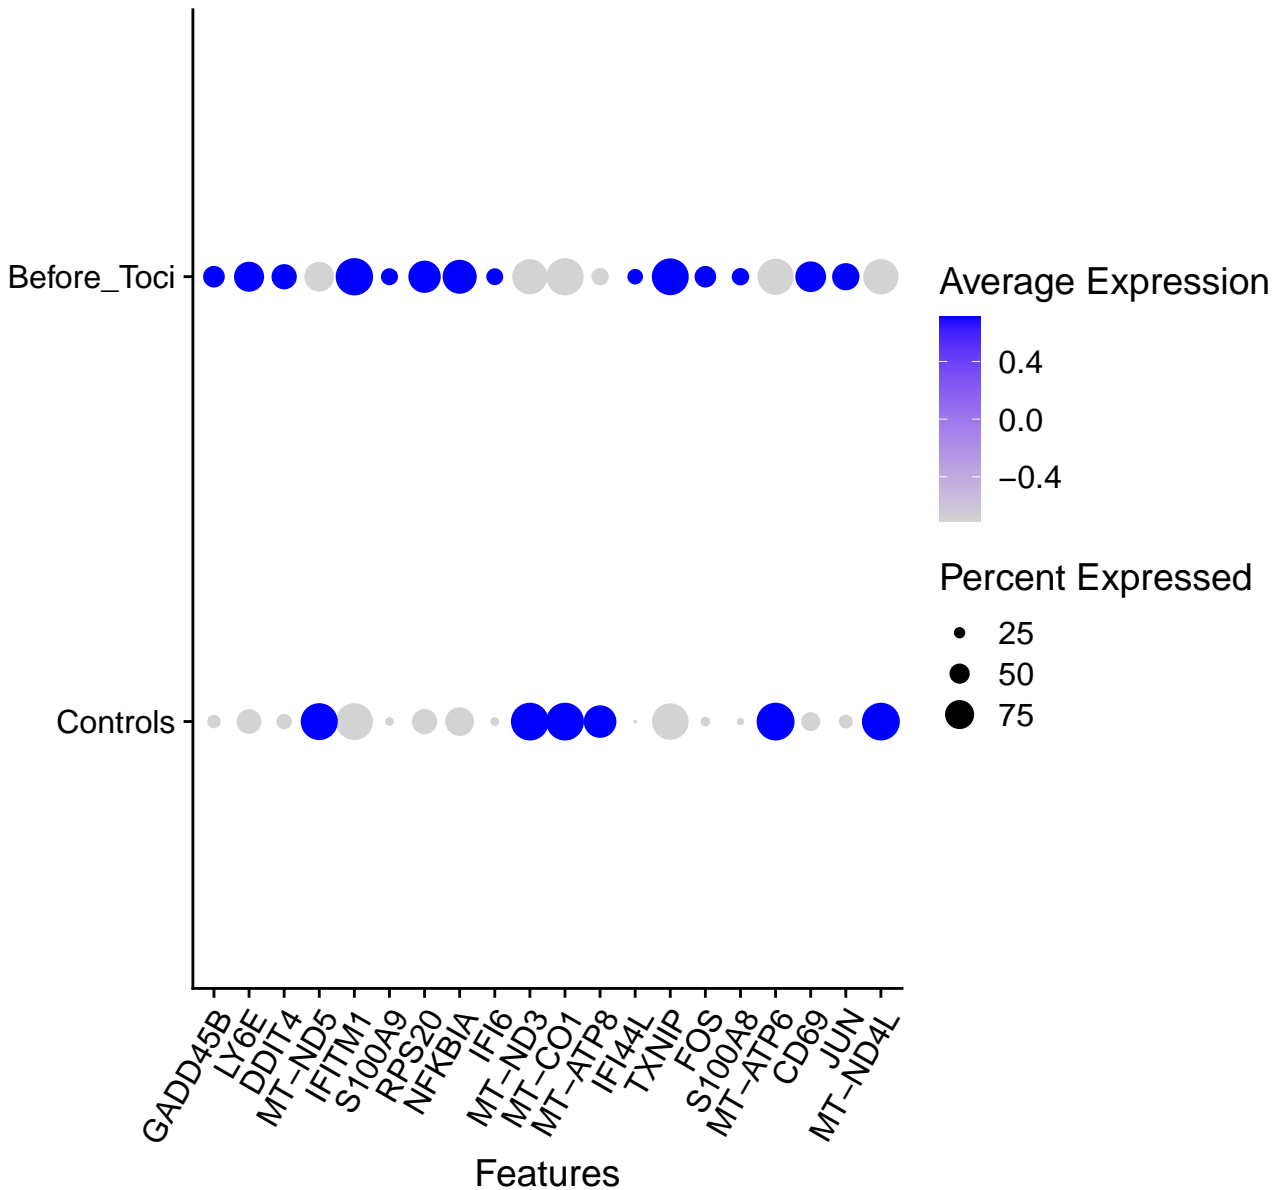

# Classical monocytes

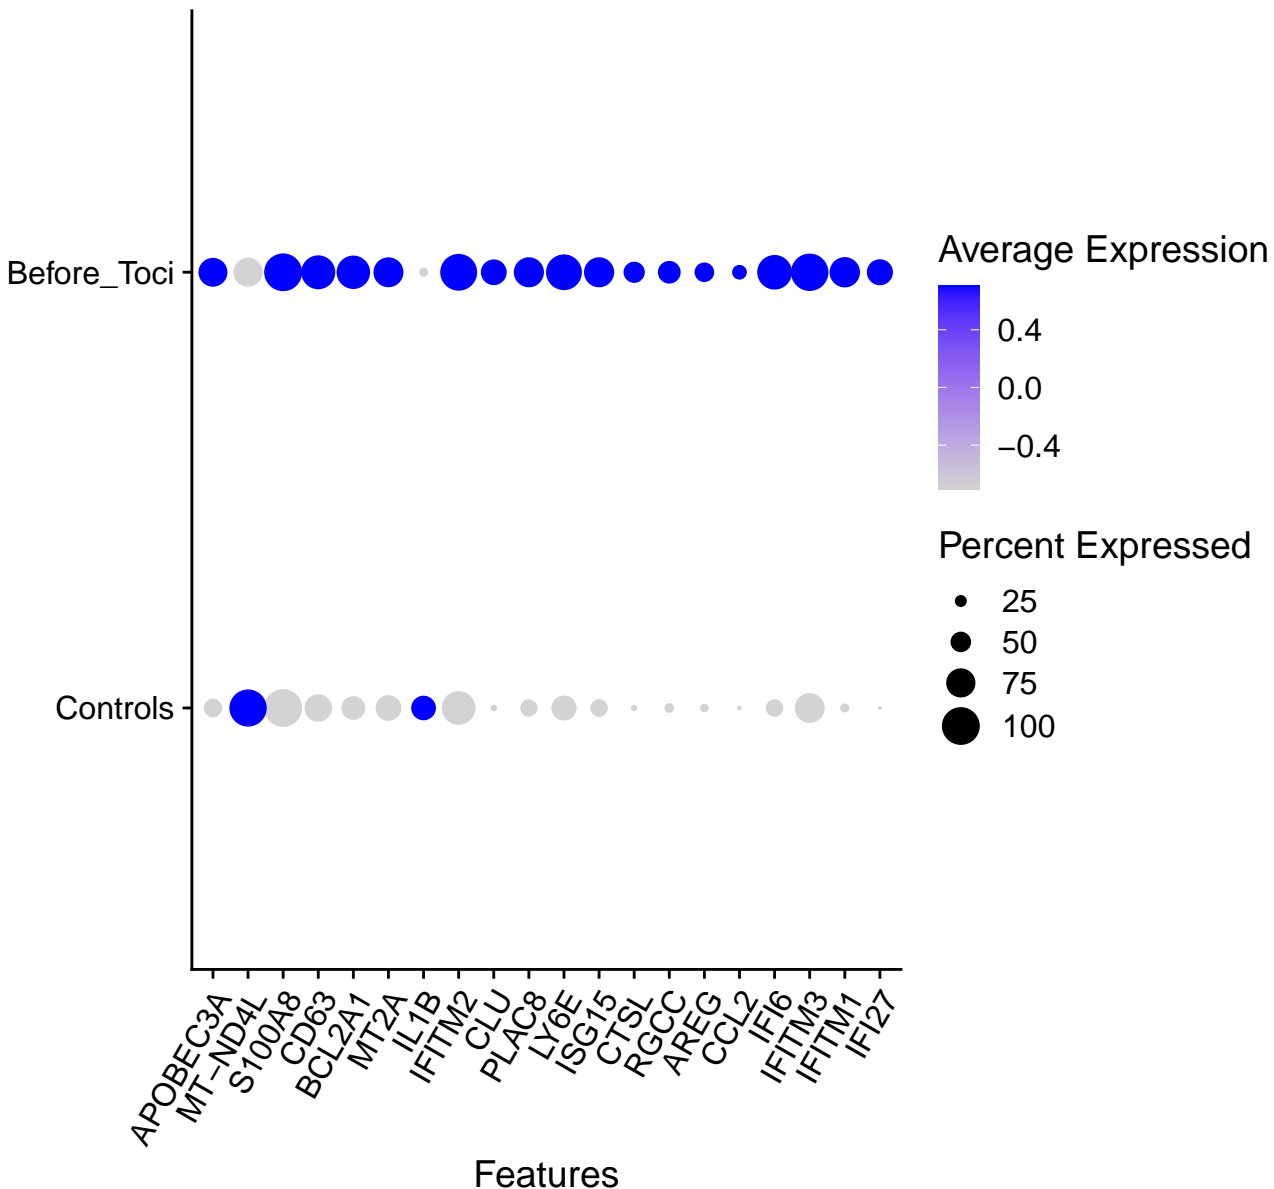

# Effector T

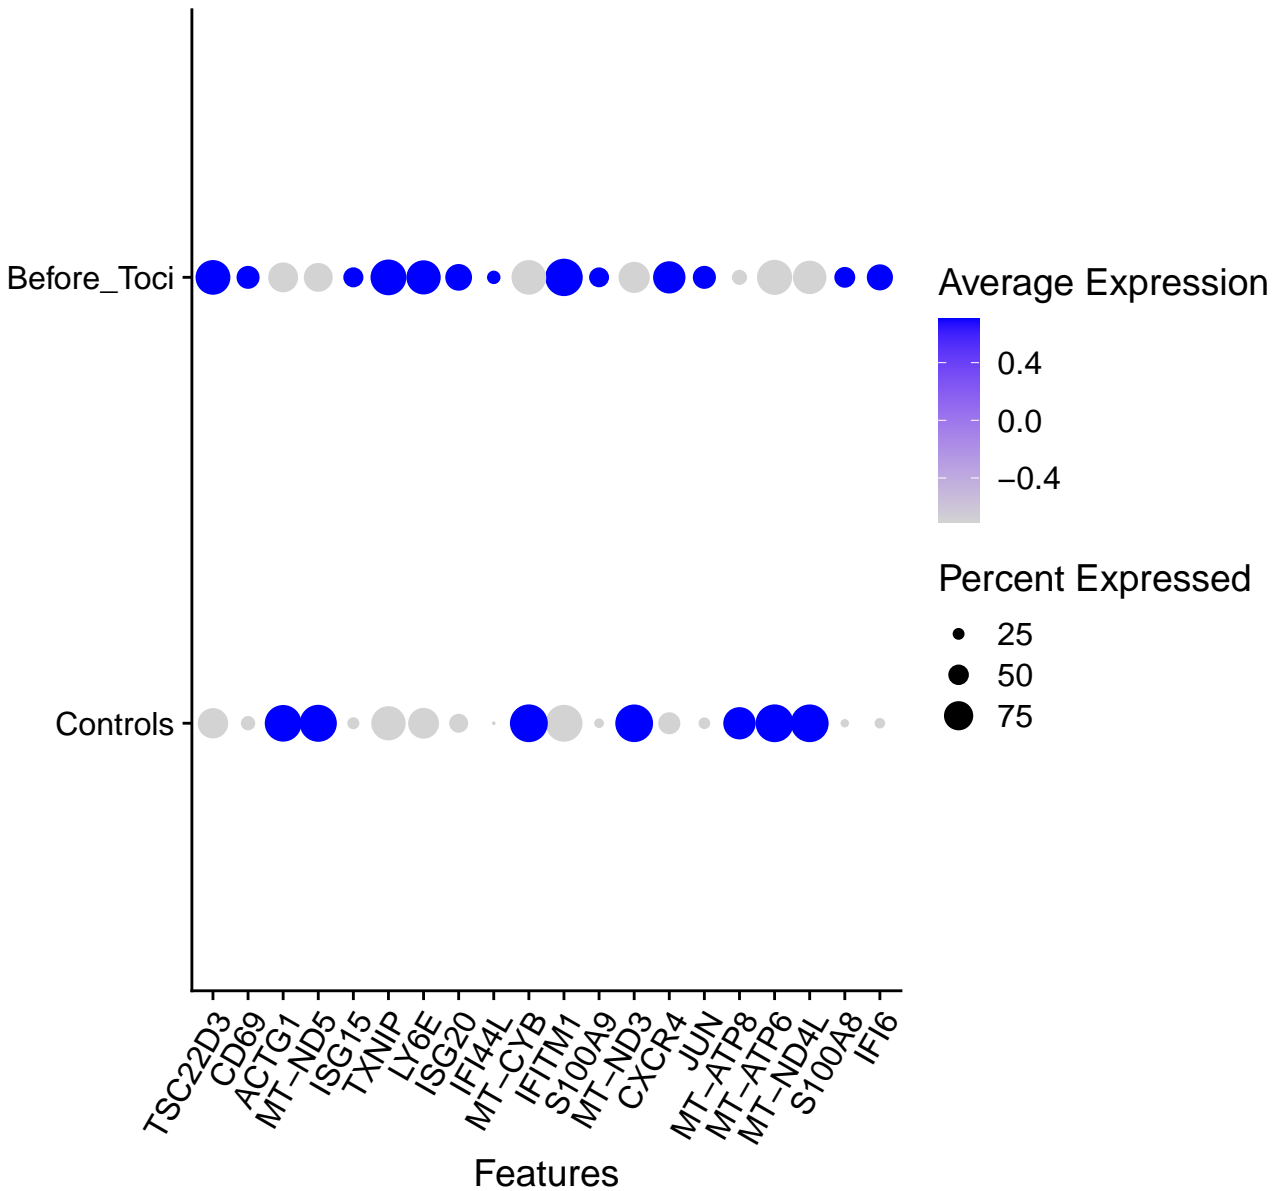

# NK CD56dim

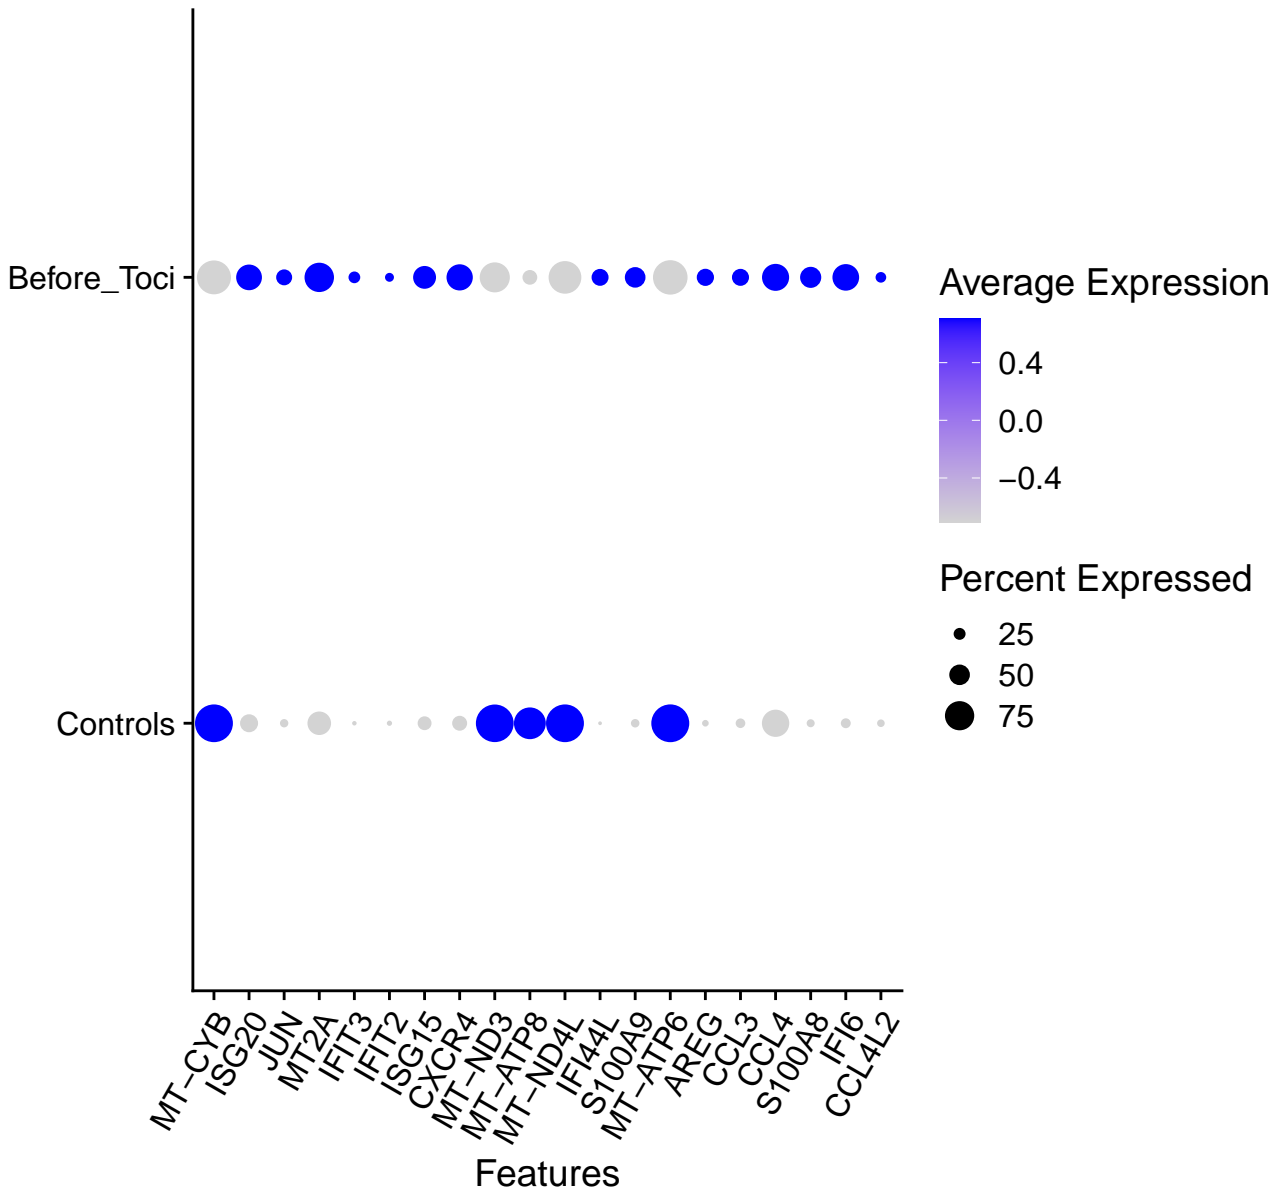

# Memory CD4 T

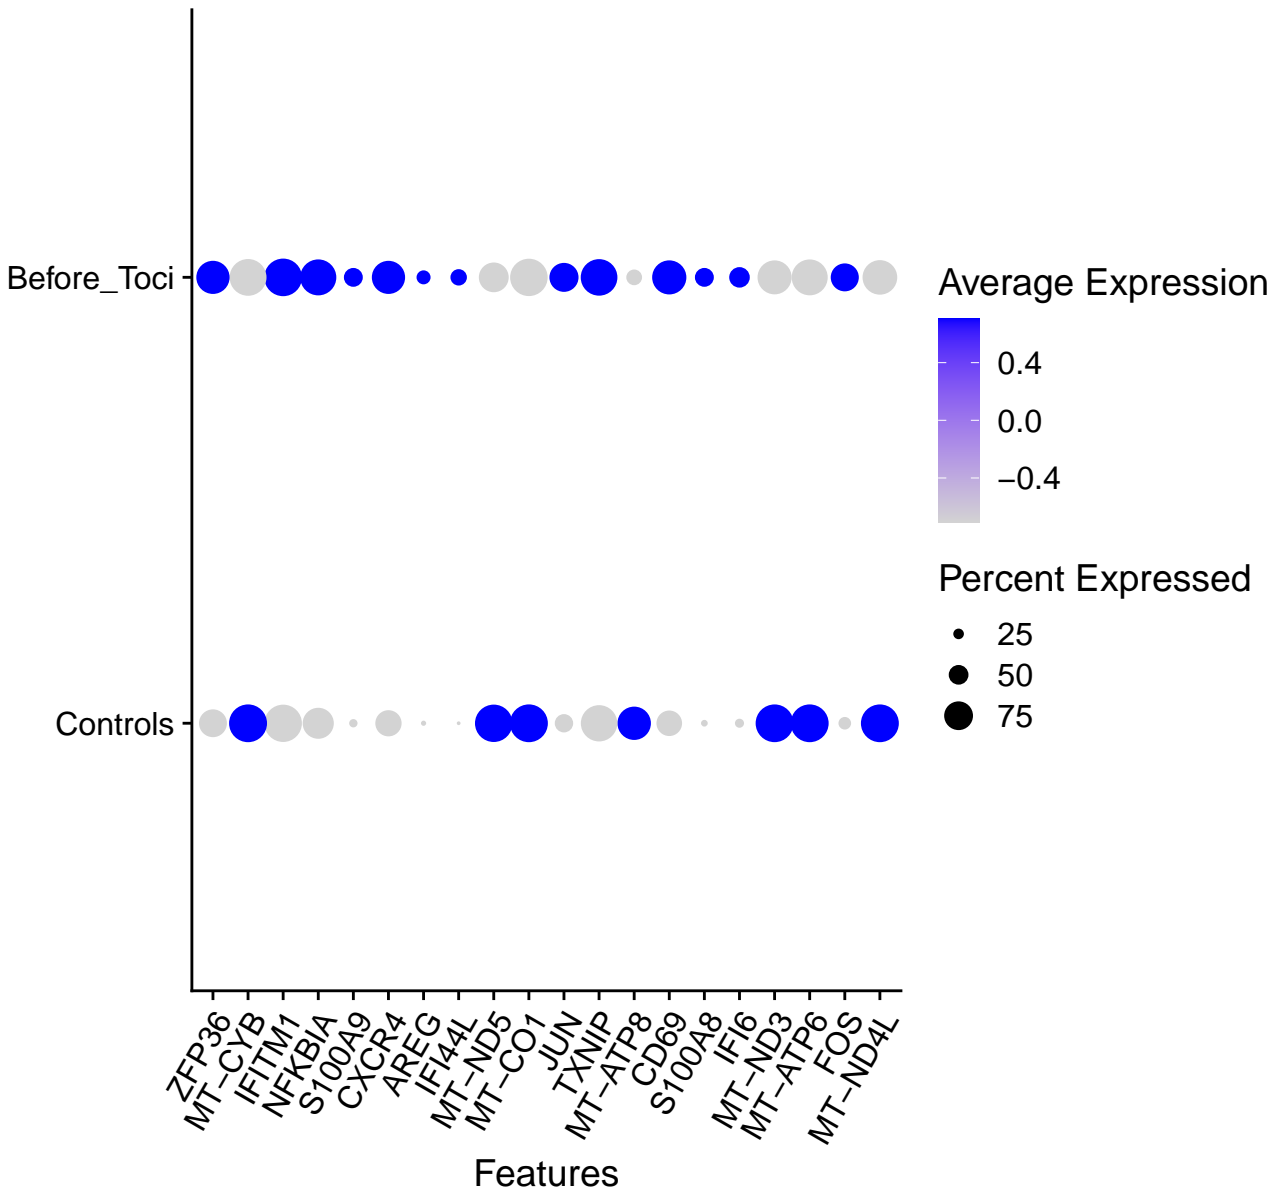

# Naive B

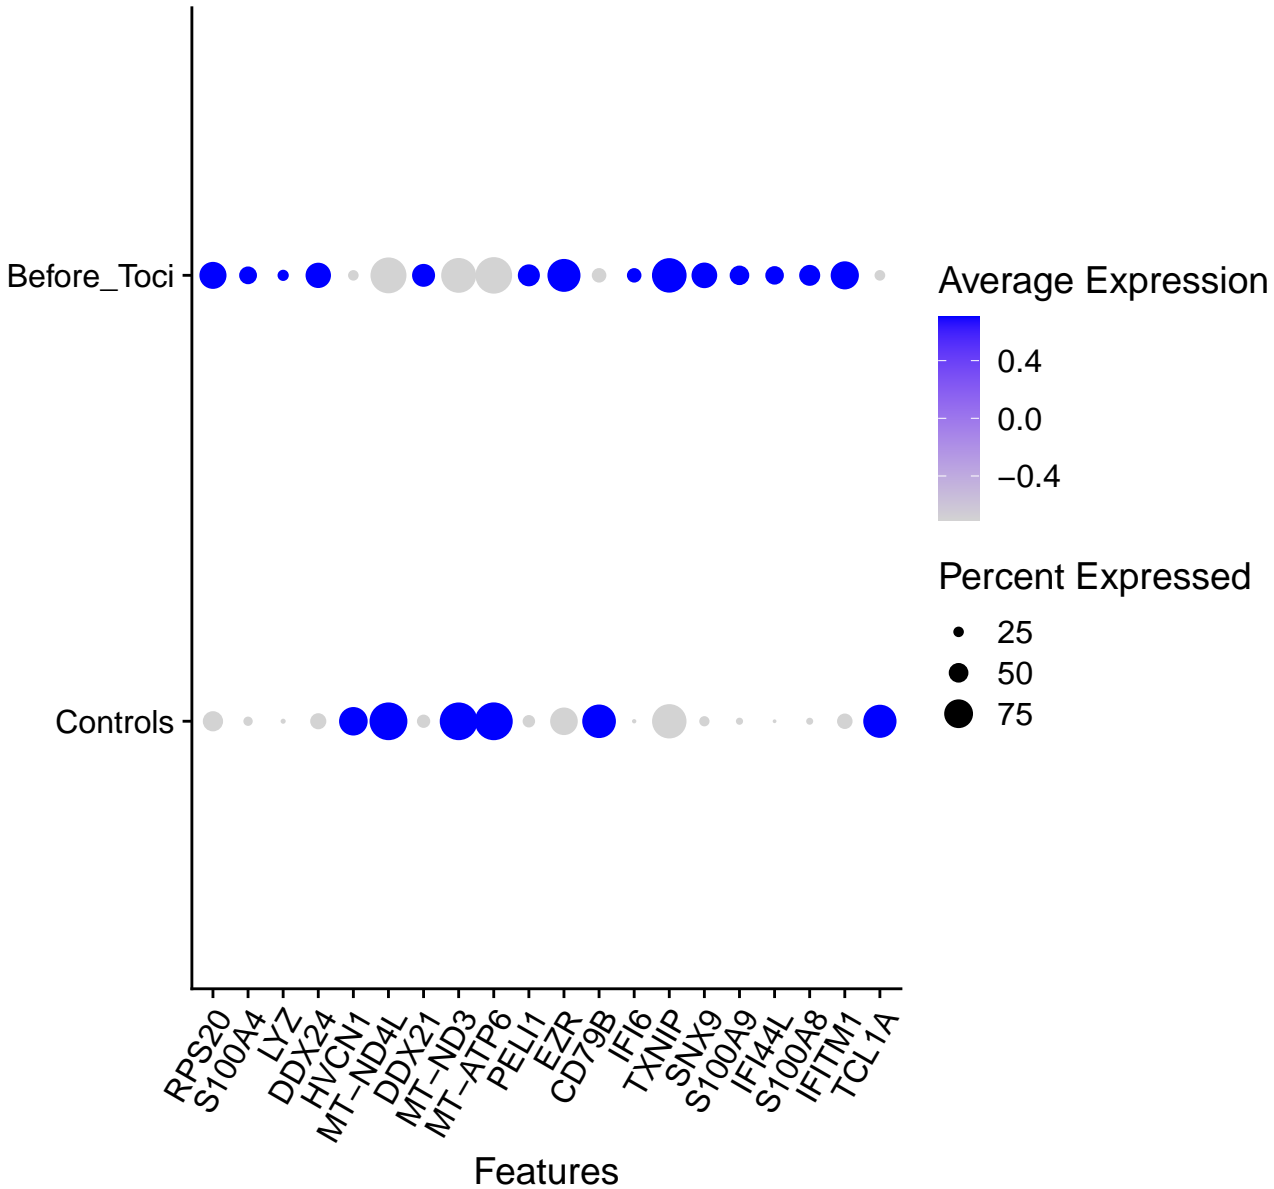

# NC & IM monocytes

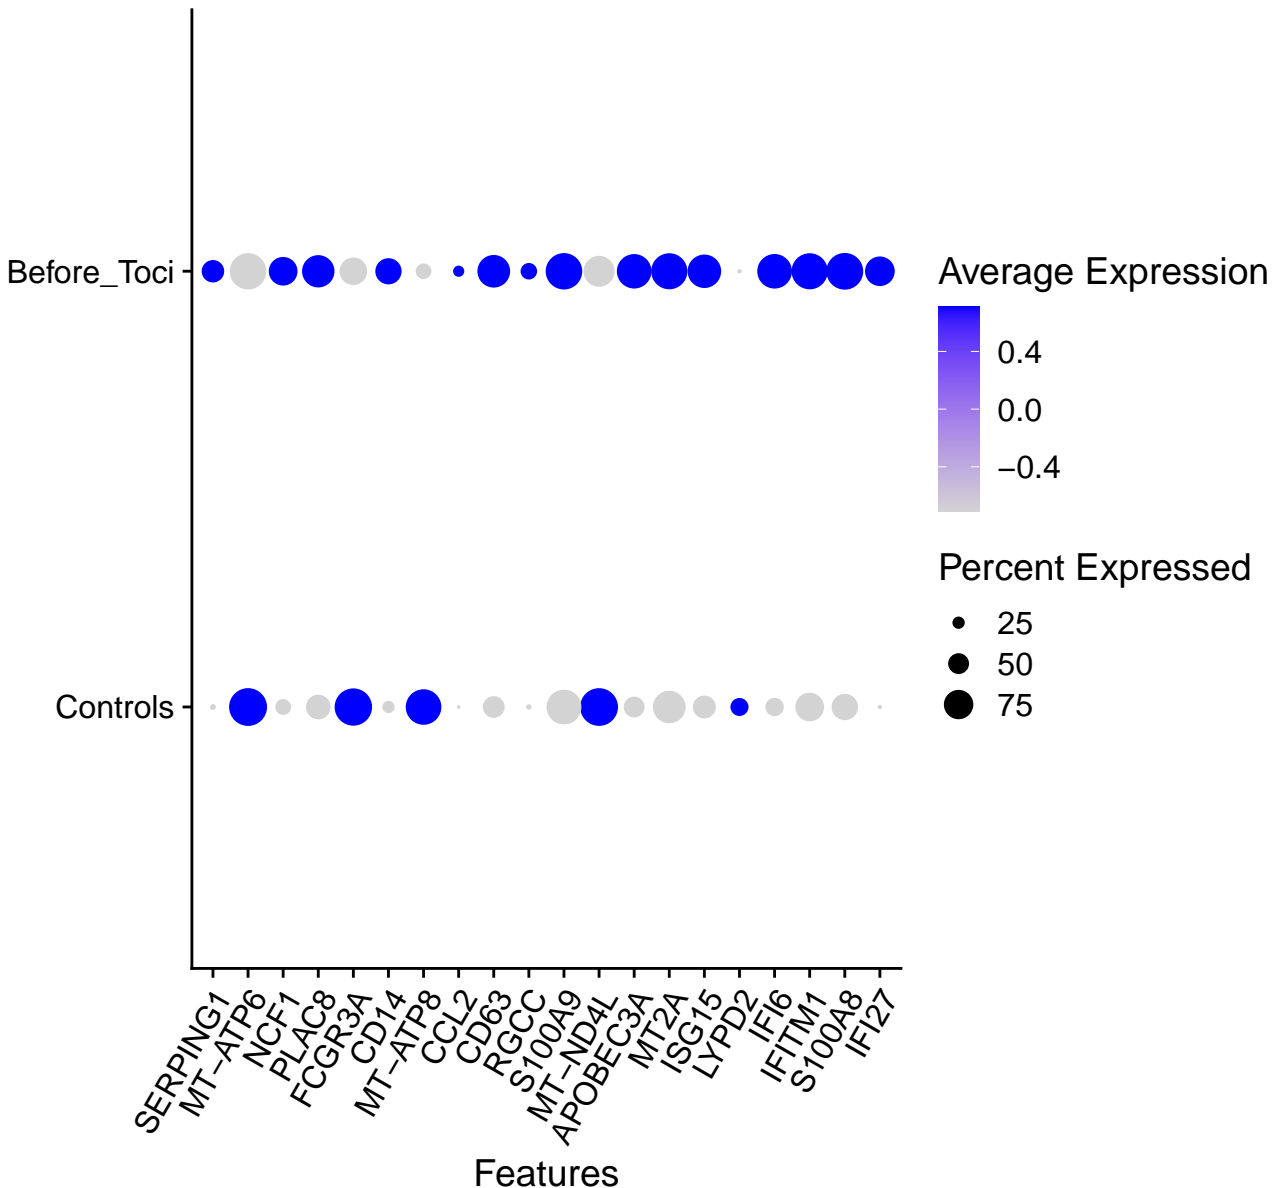

# Classical monocytes

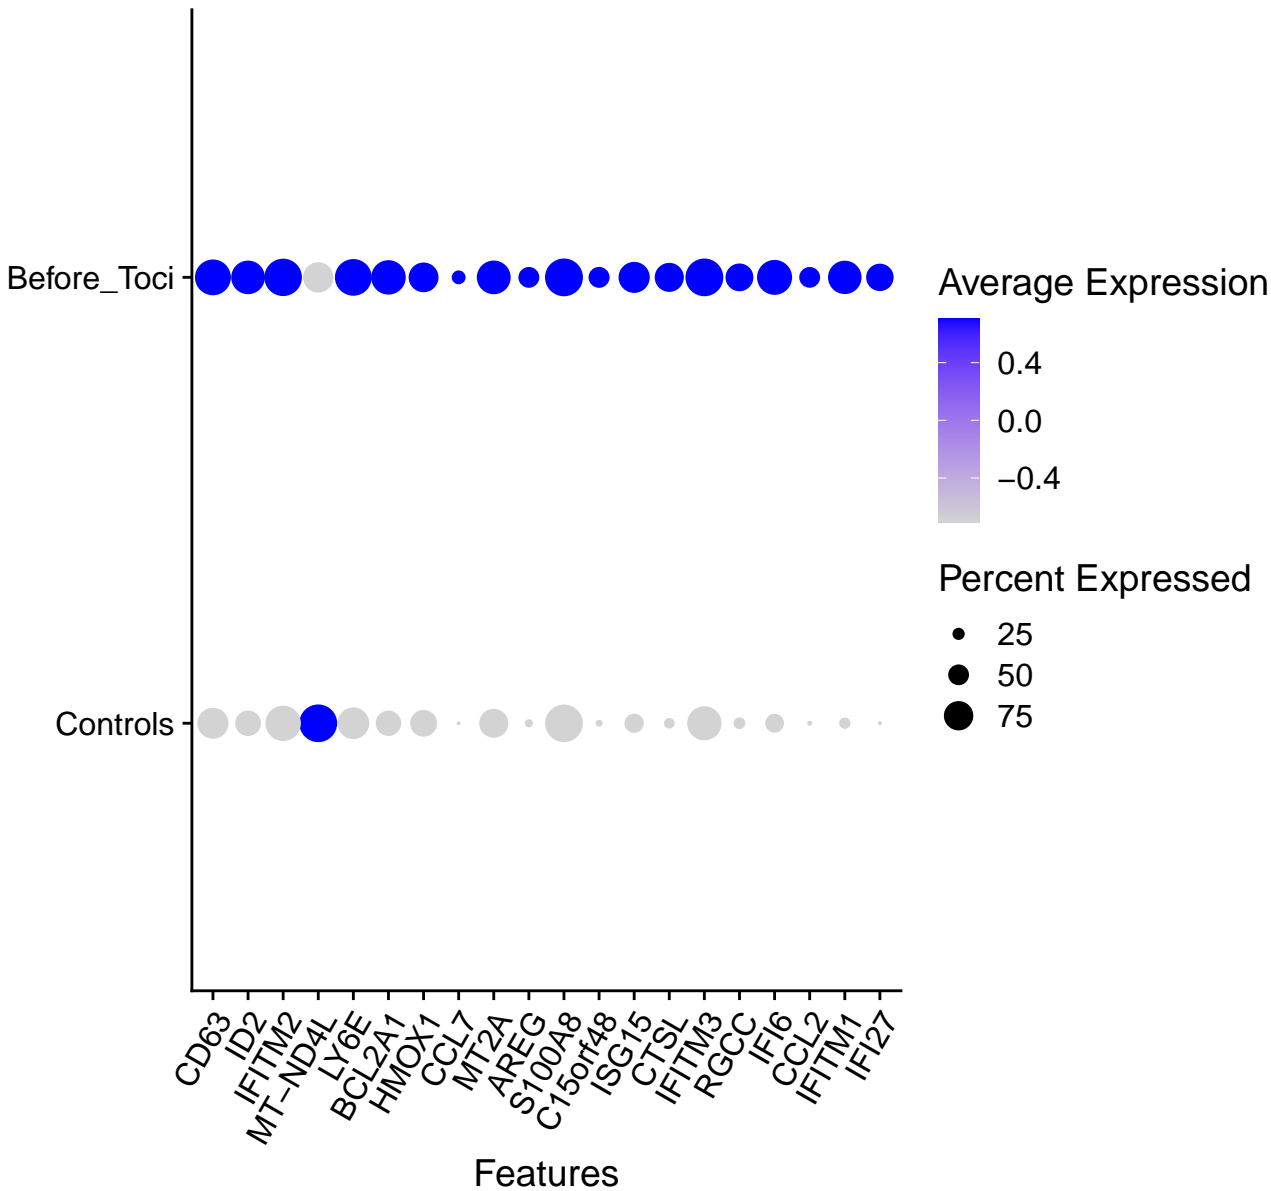



# Memory CD8 T

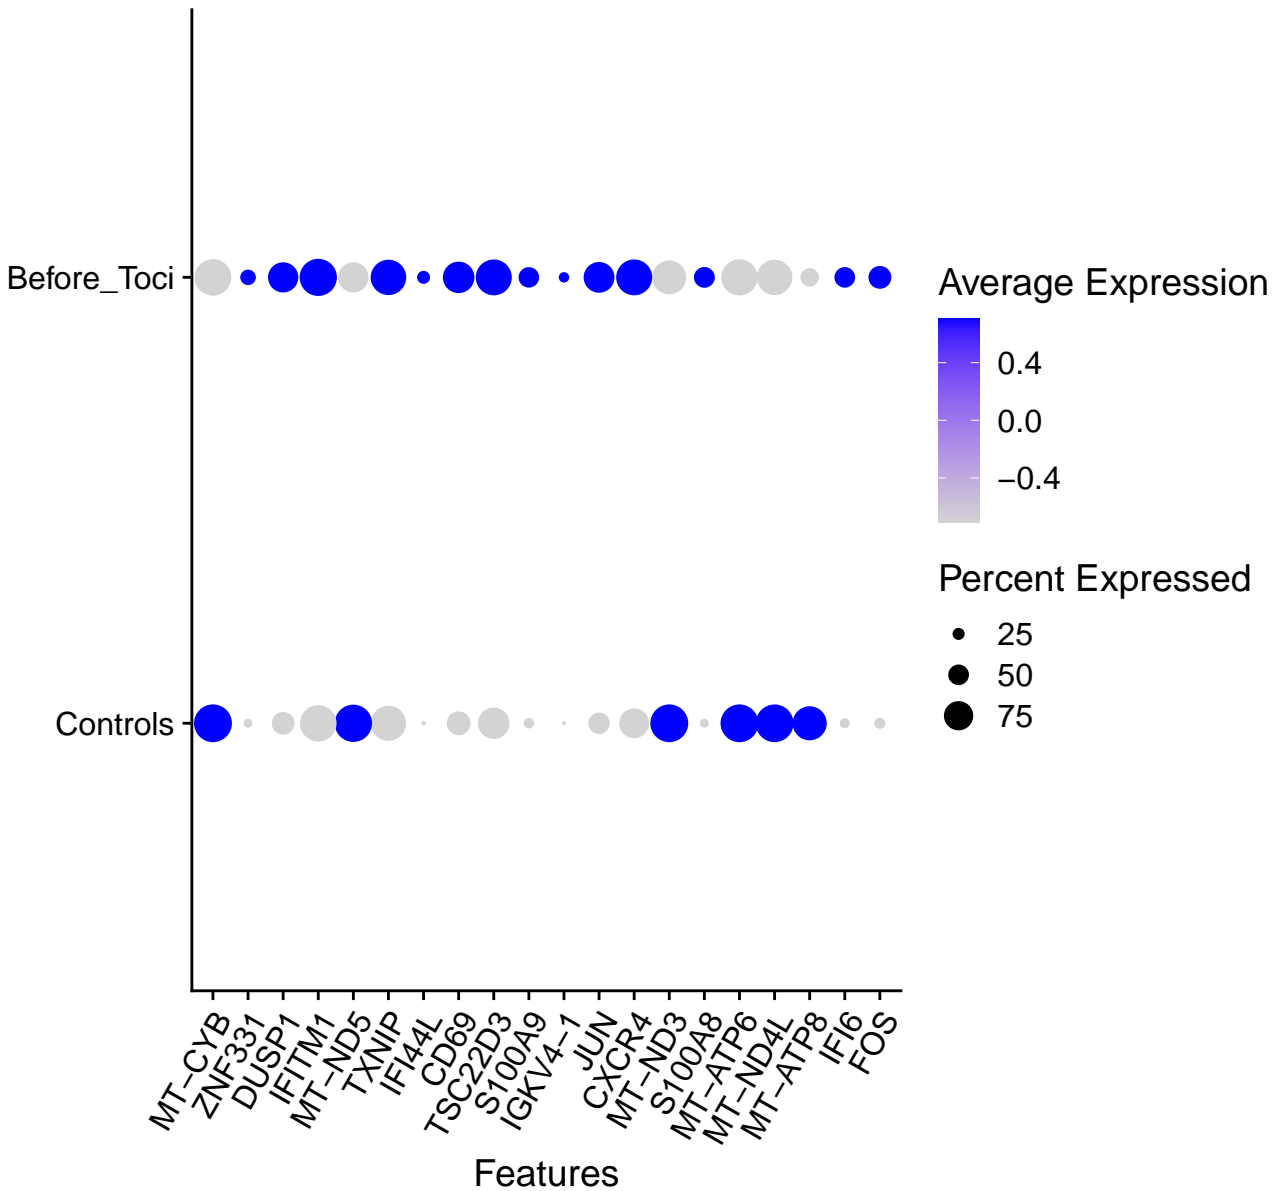

# Dying T & NK

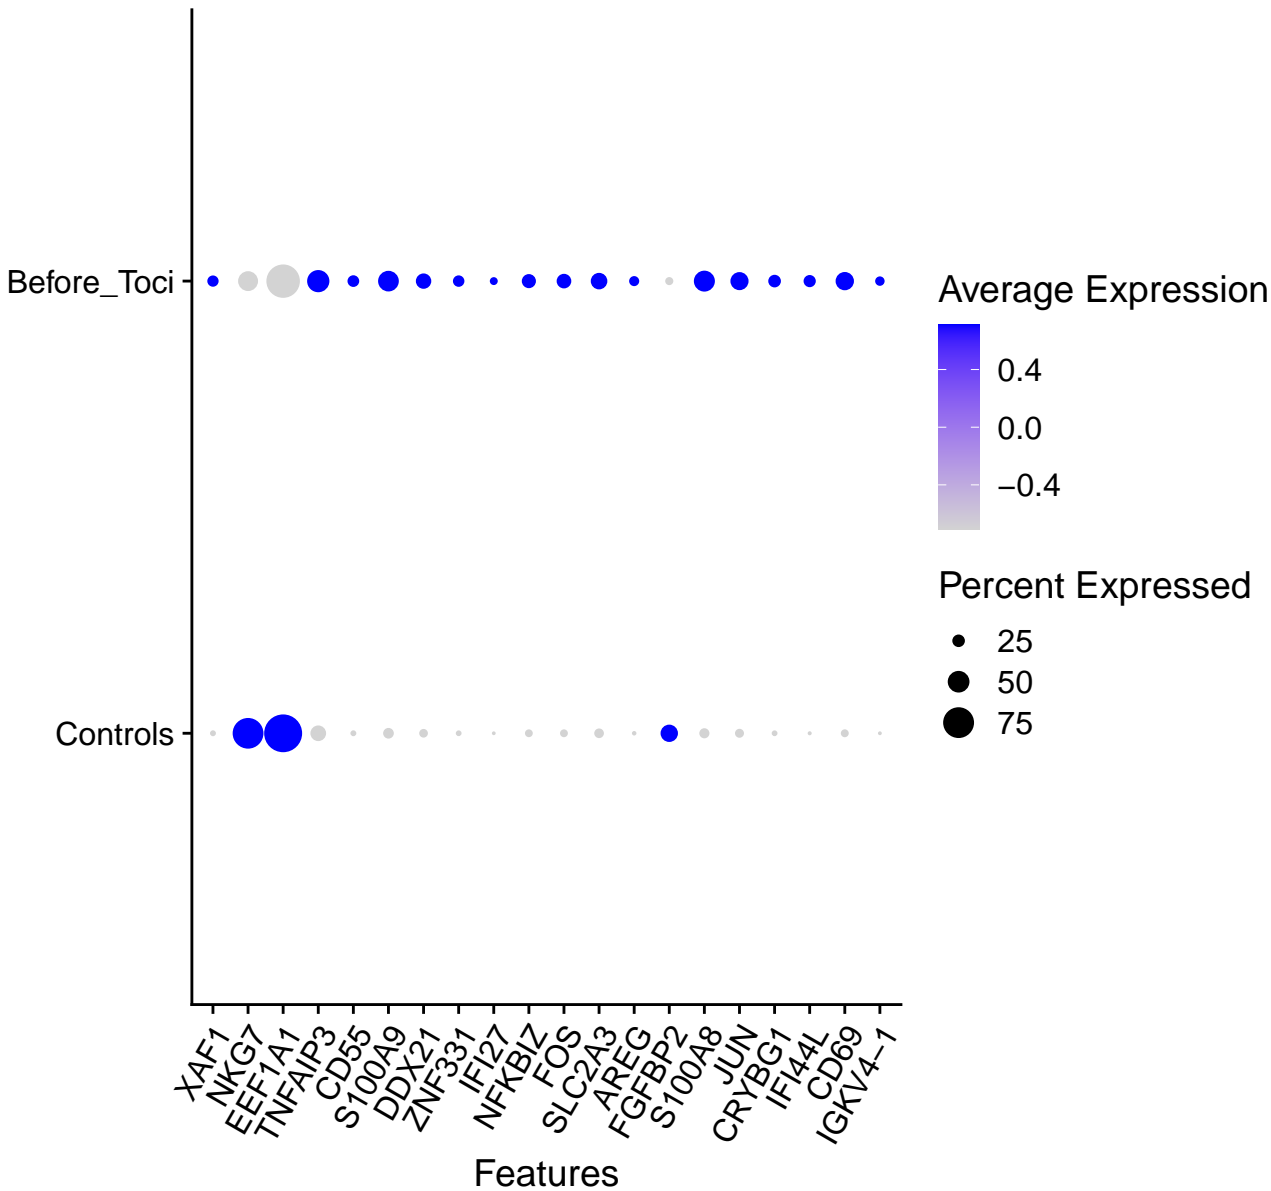

# Memory B

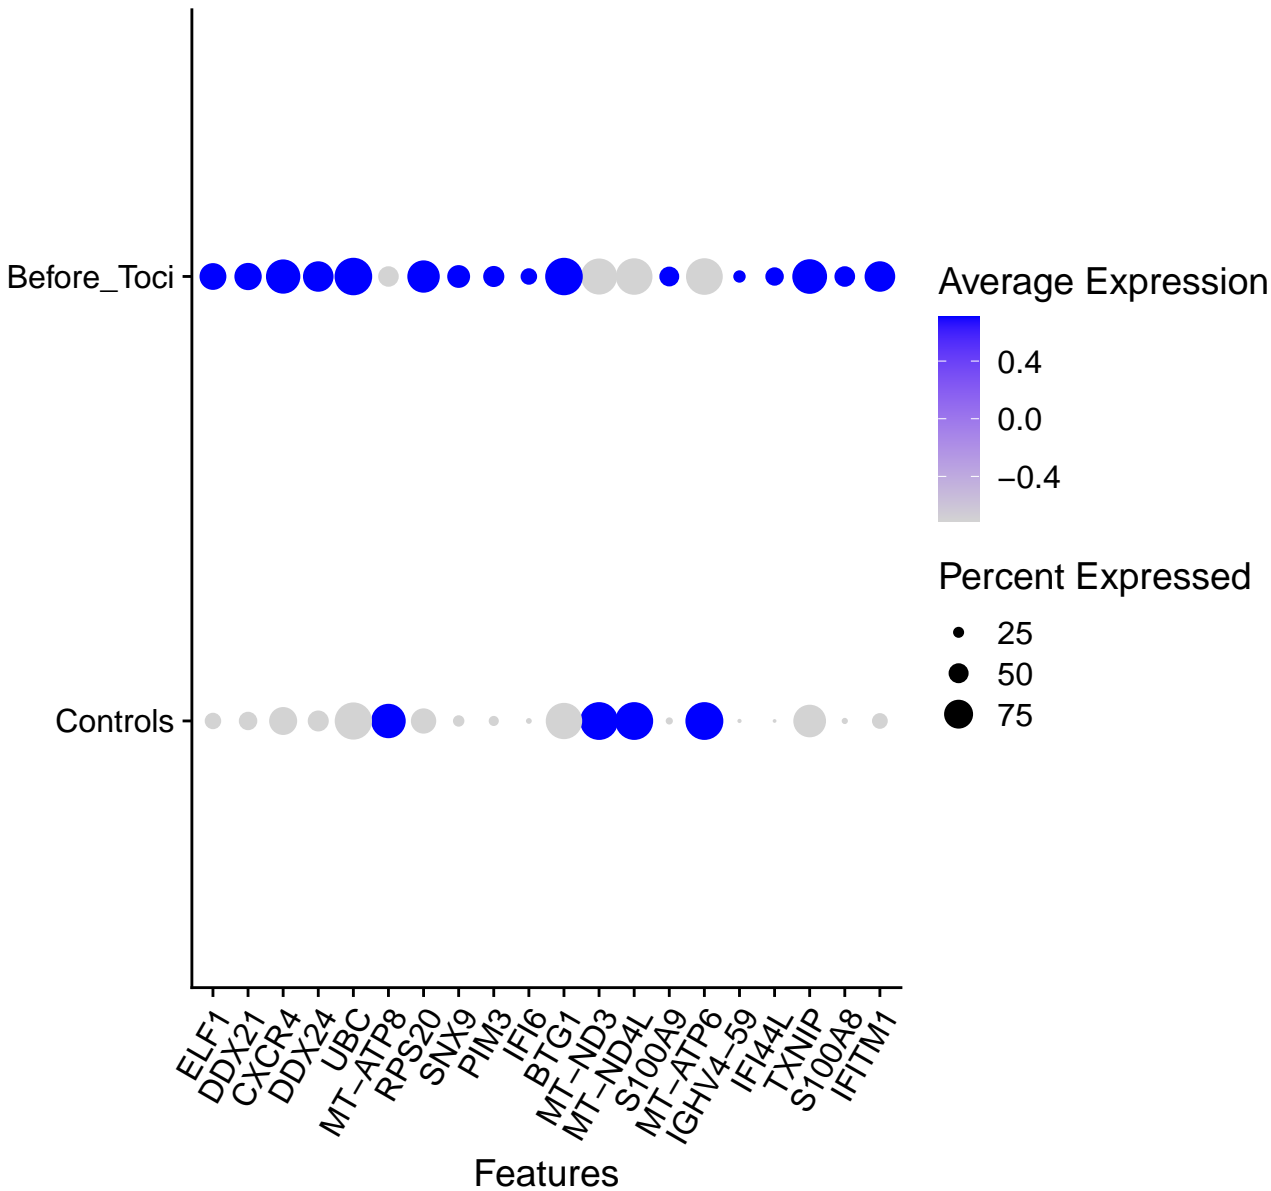

# Memory CD4 & MAIT

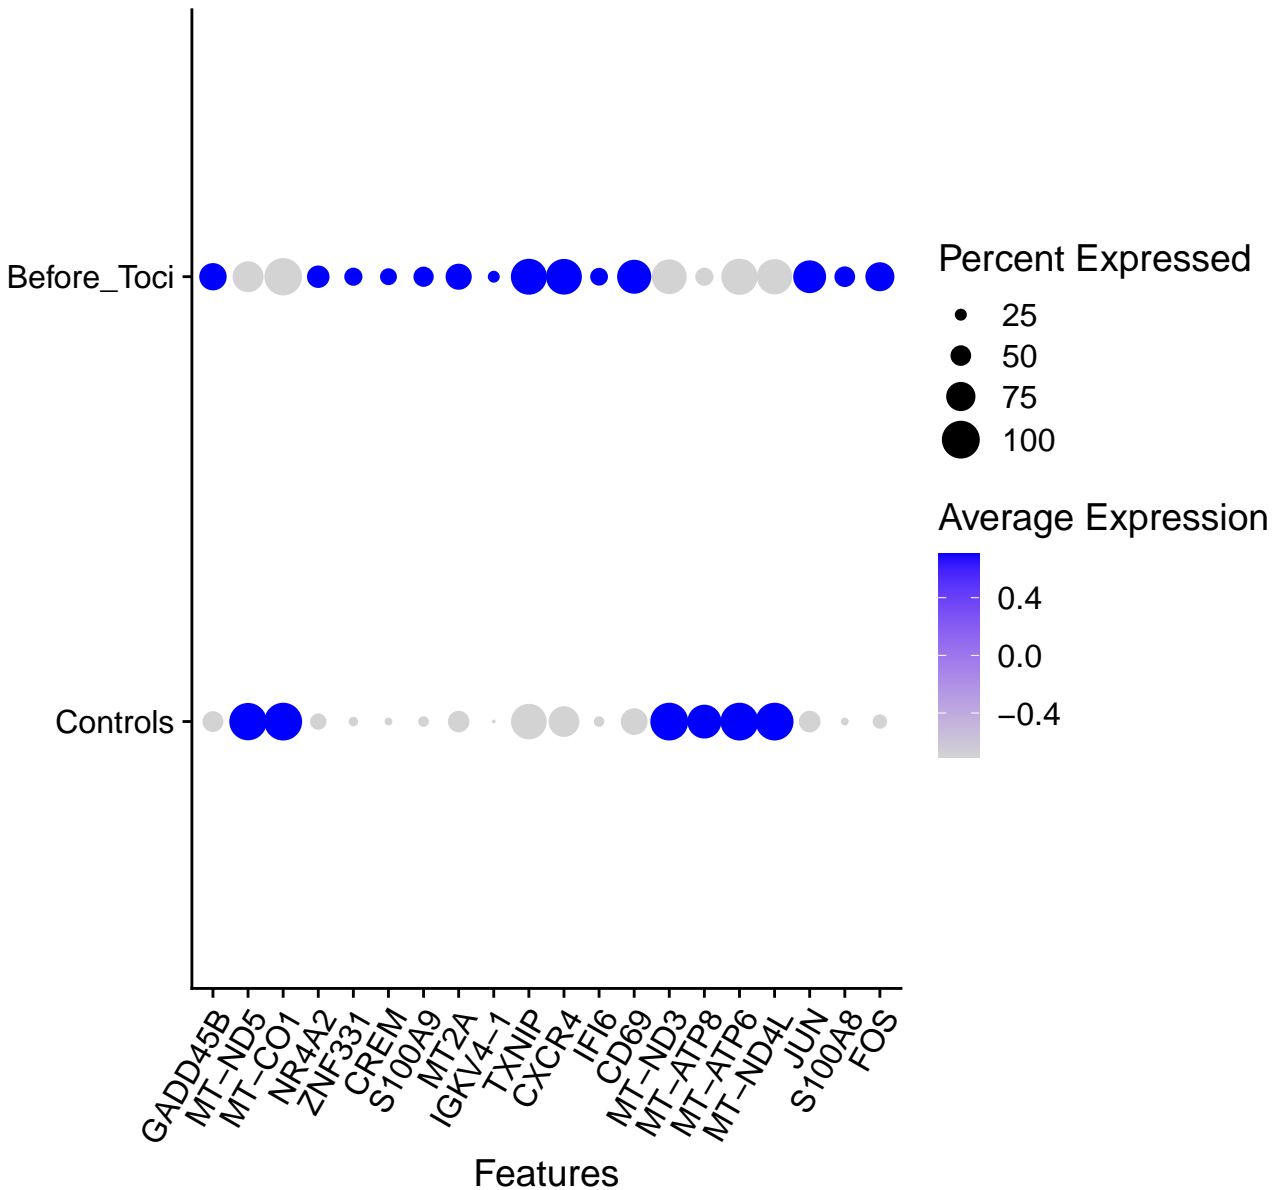

# Gamma delta T

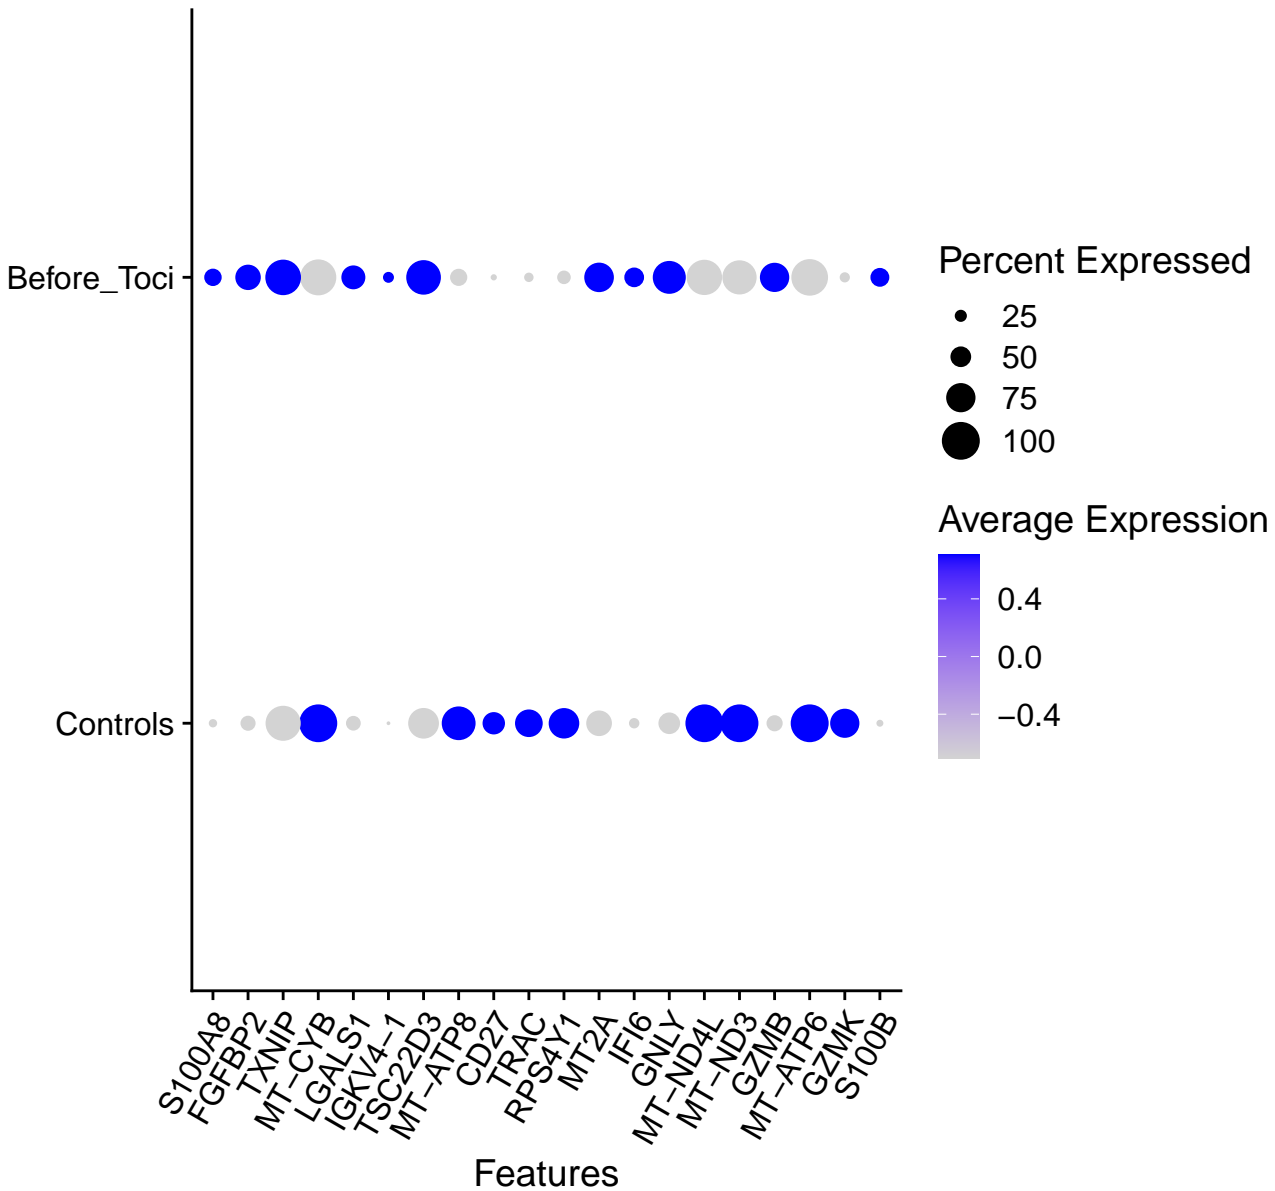

# Tregs

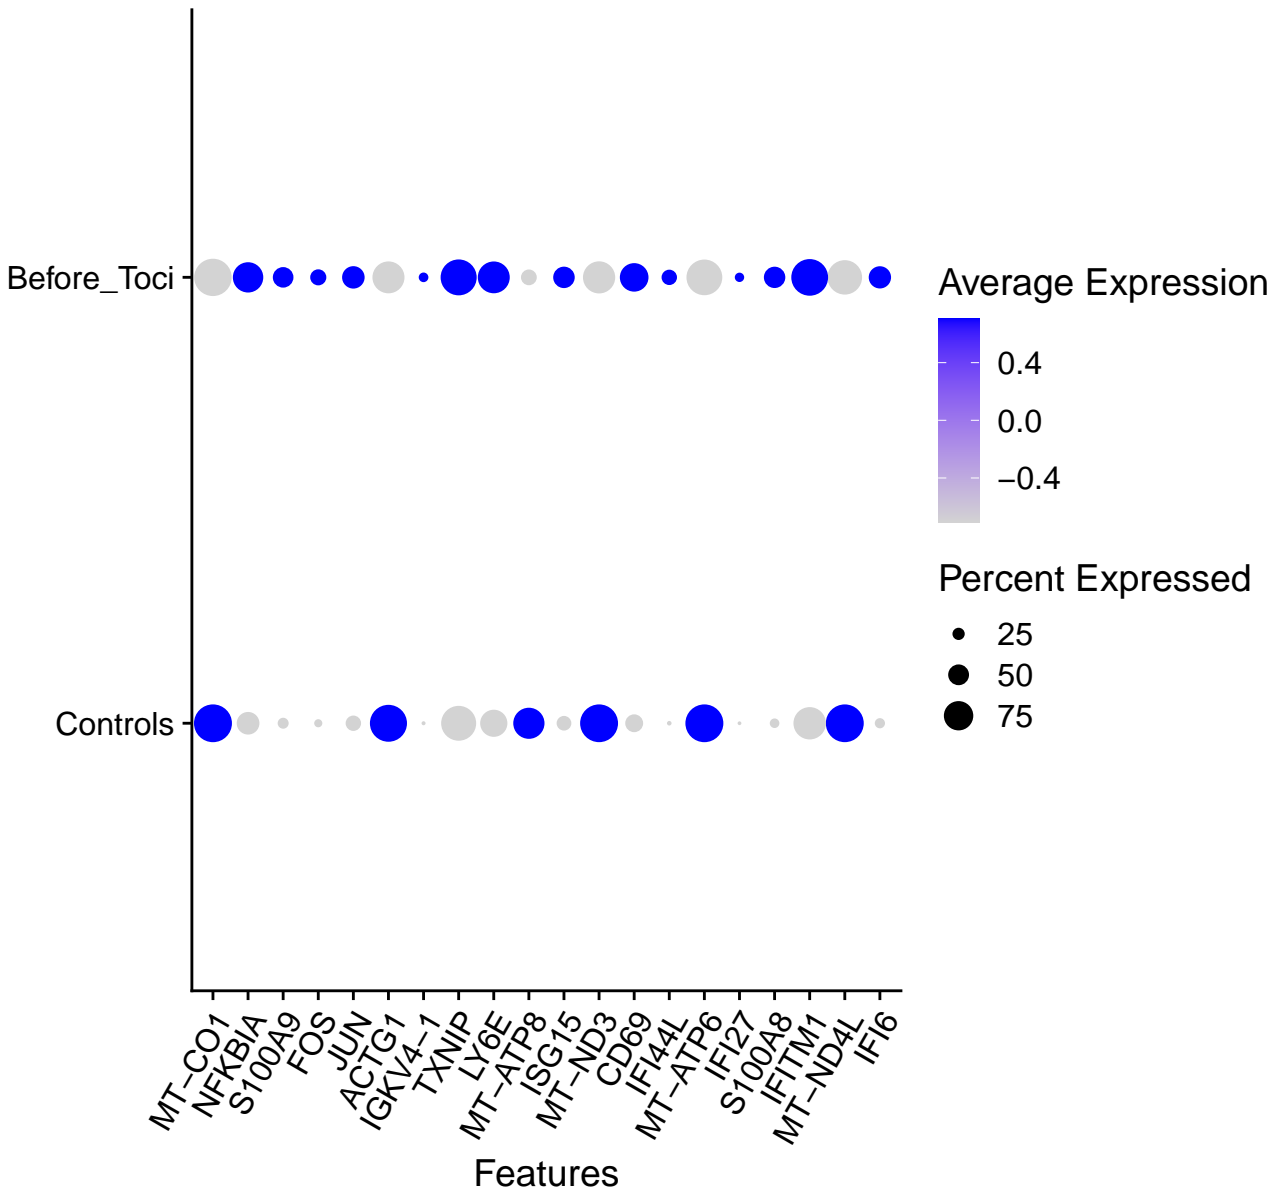

# Naive CD8 T

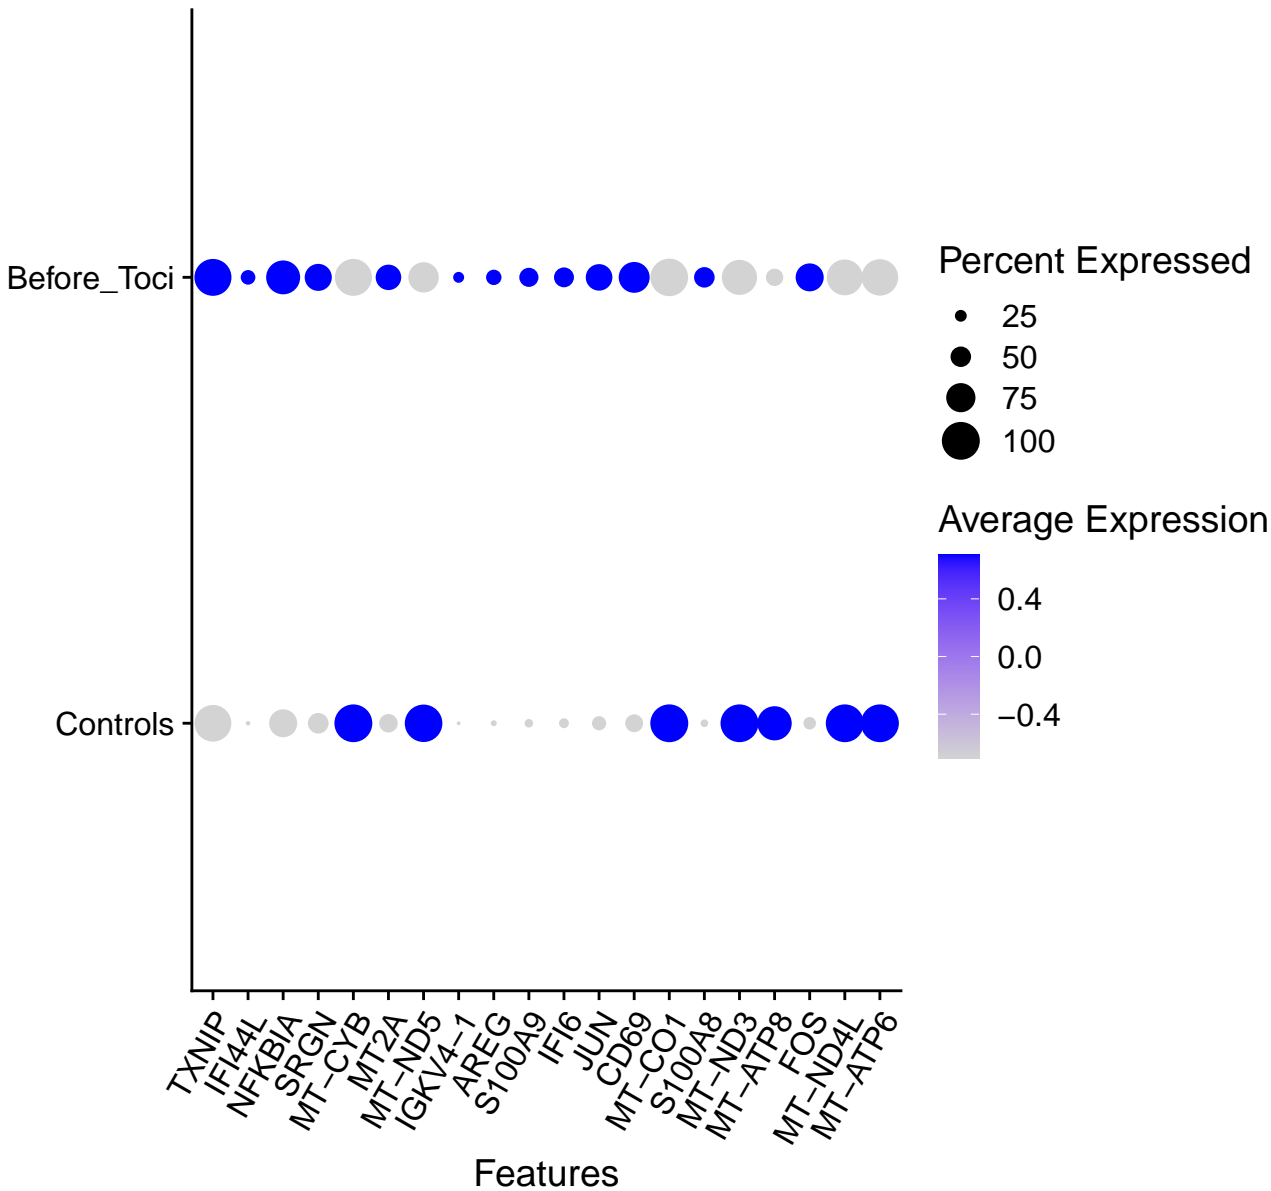

# Dying monocytes

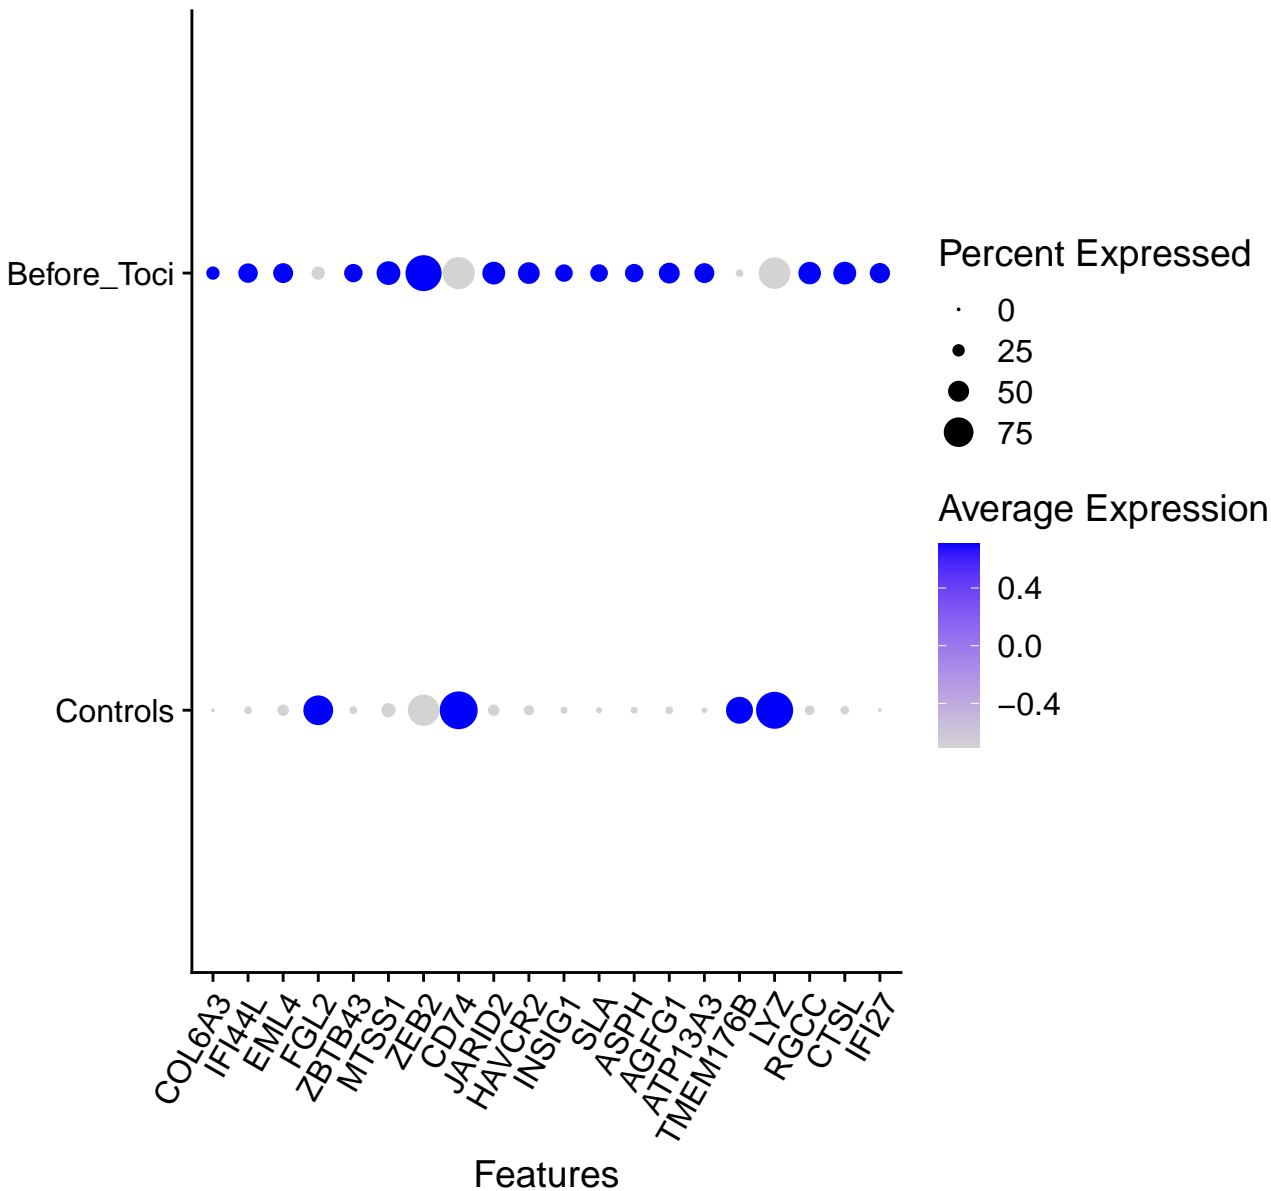



# Platelets

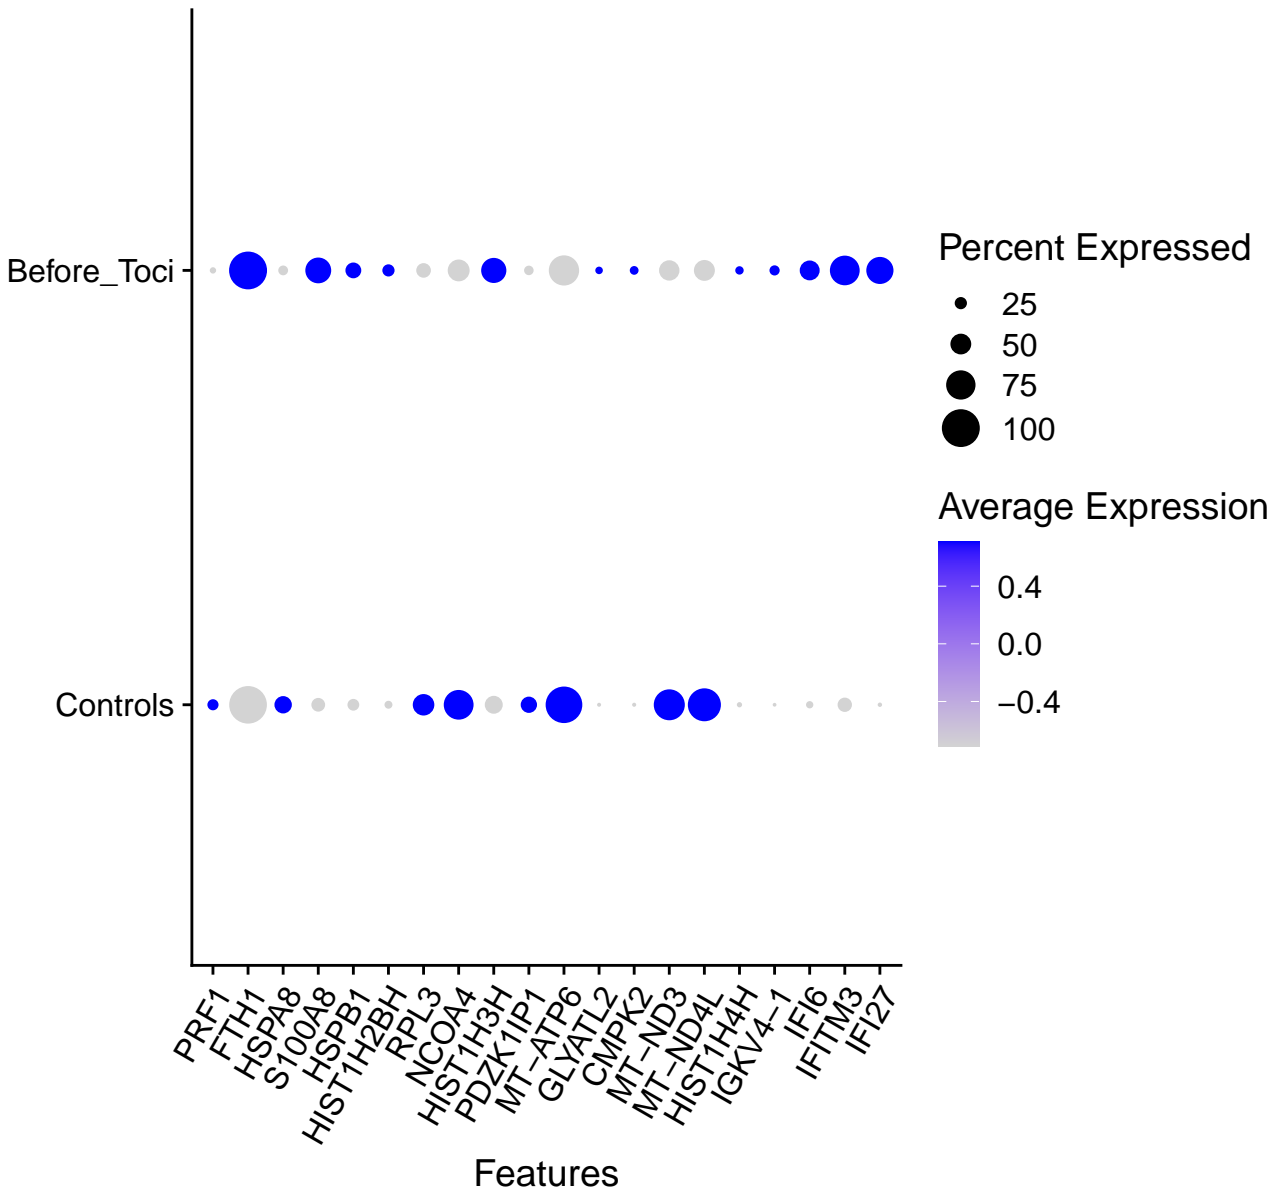

# NK CD56bright

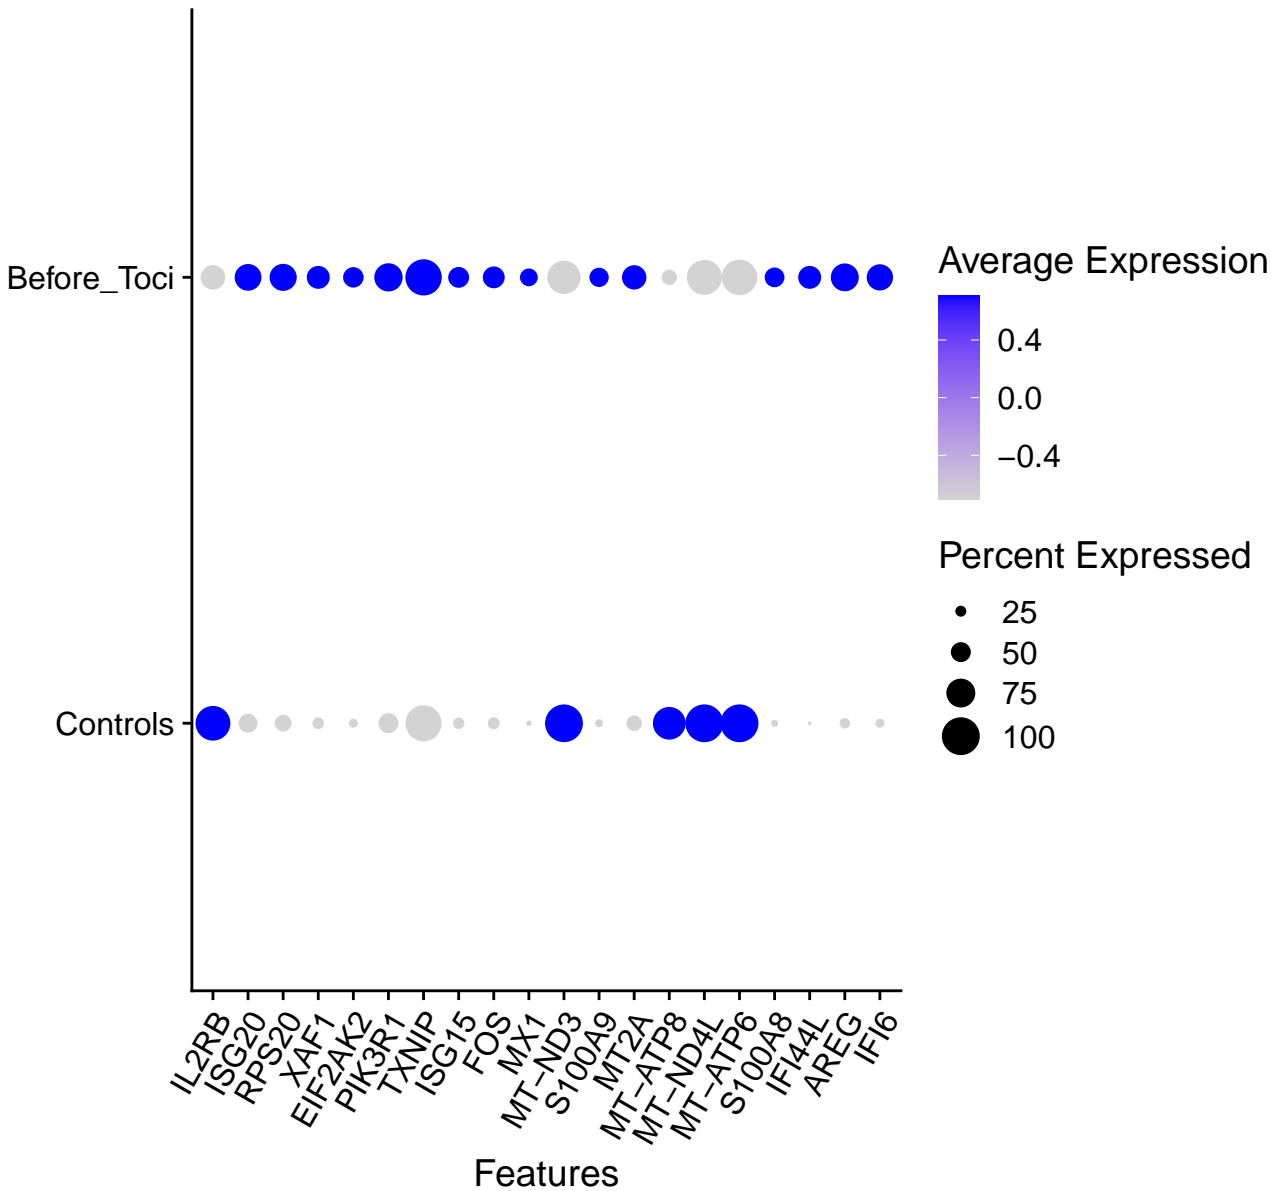

# Myeloid DC

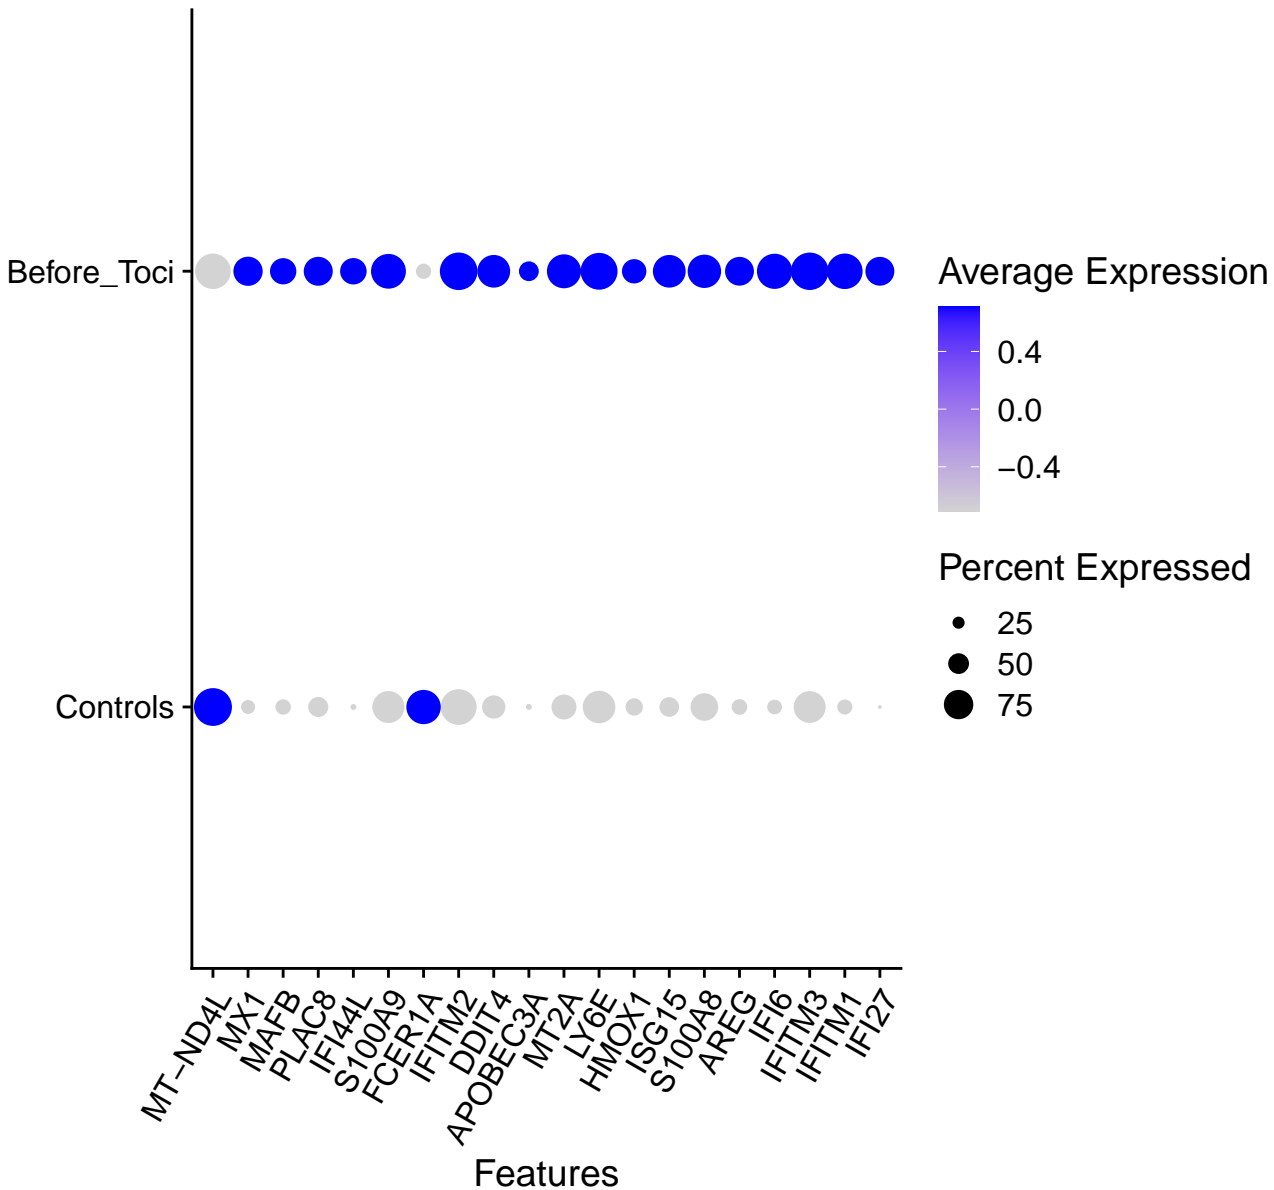

# Dividing T & NK

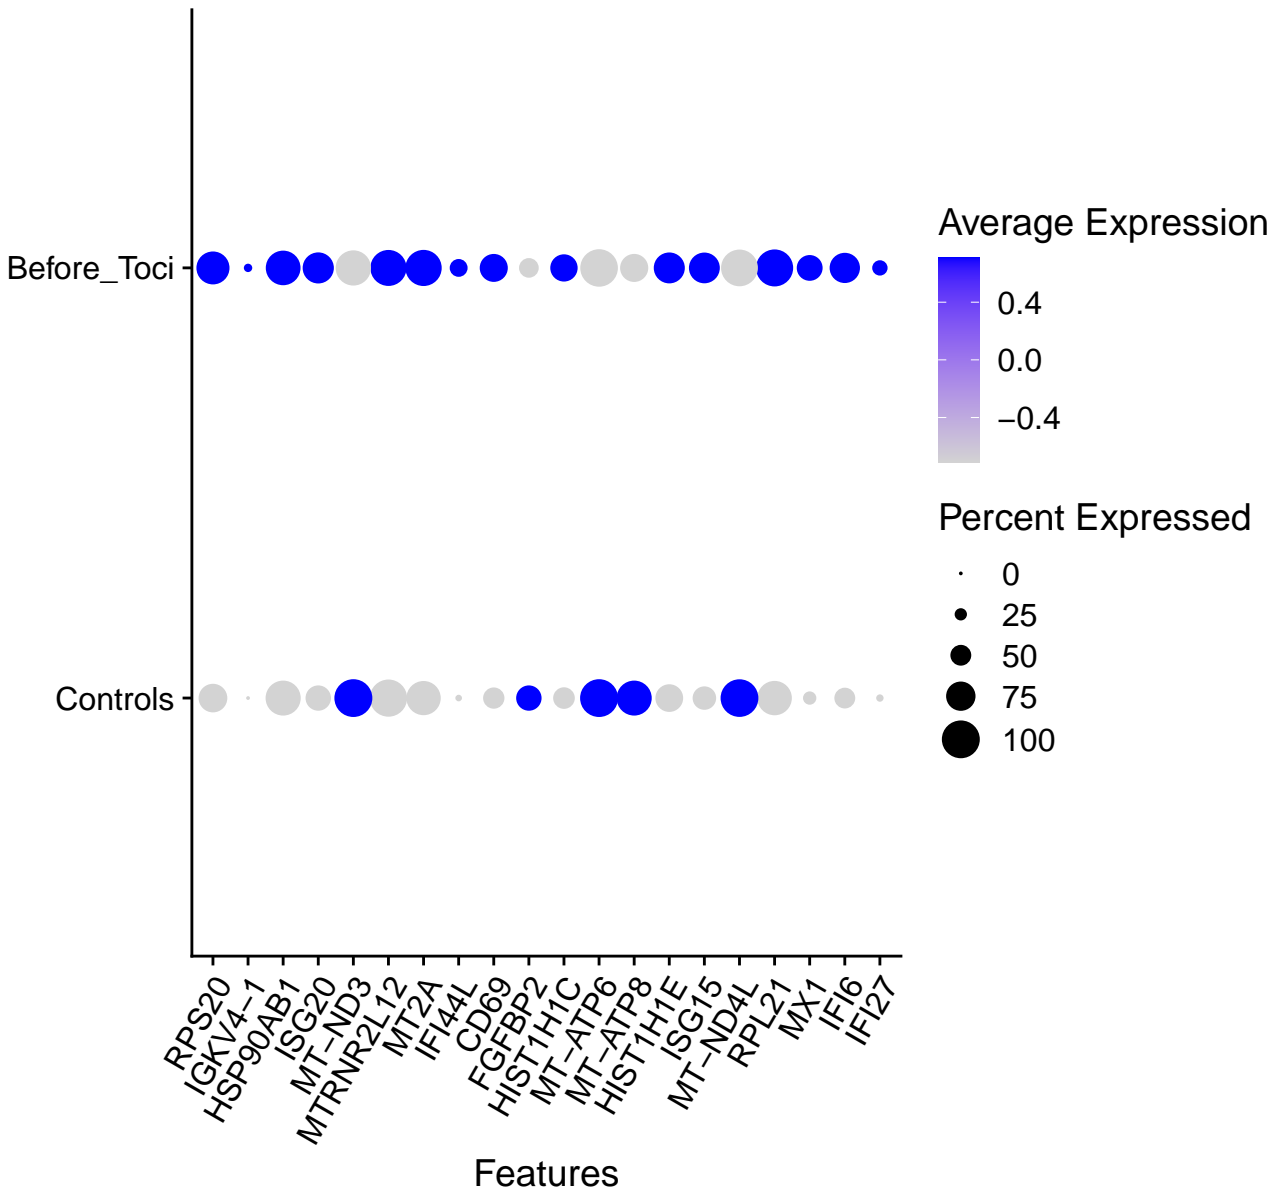

# Plasma cells

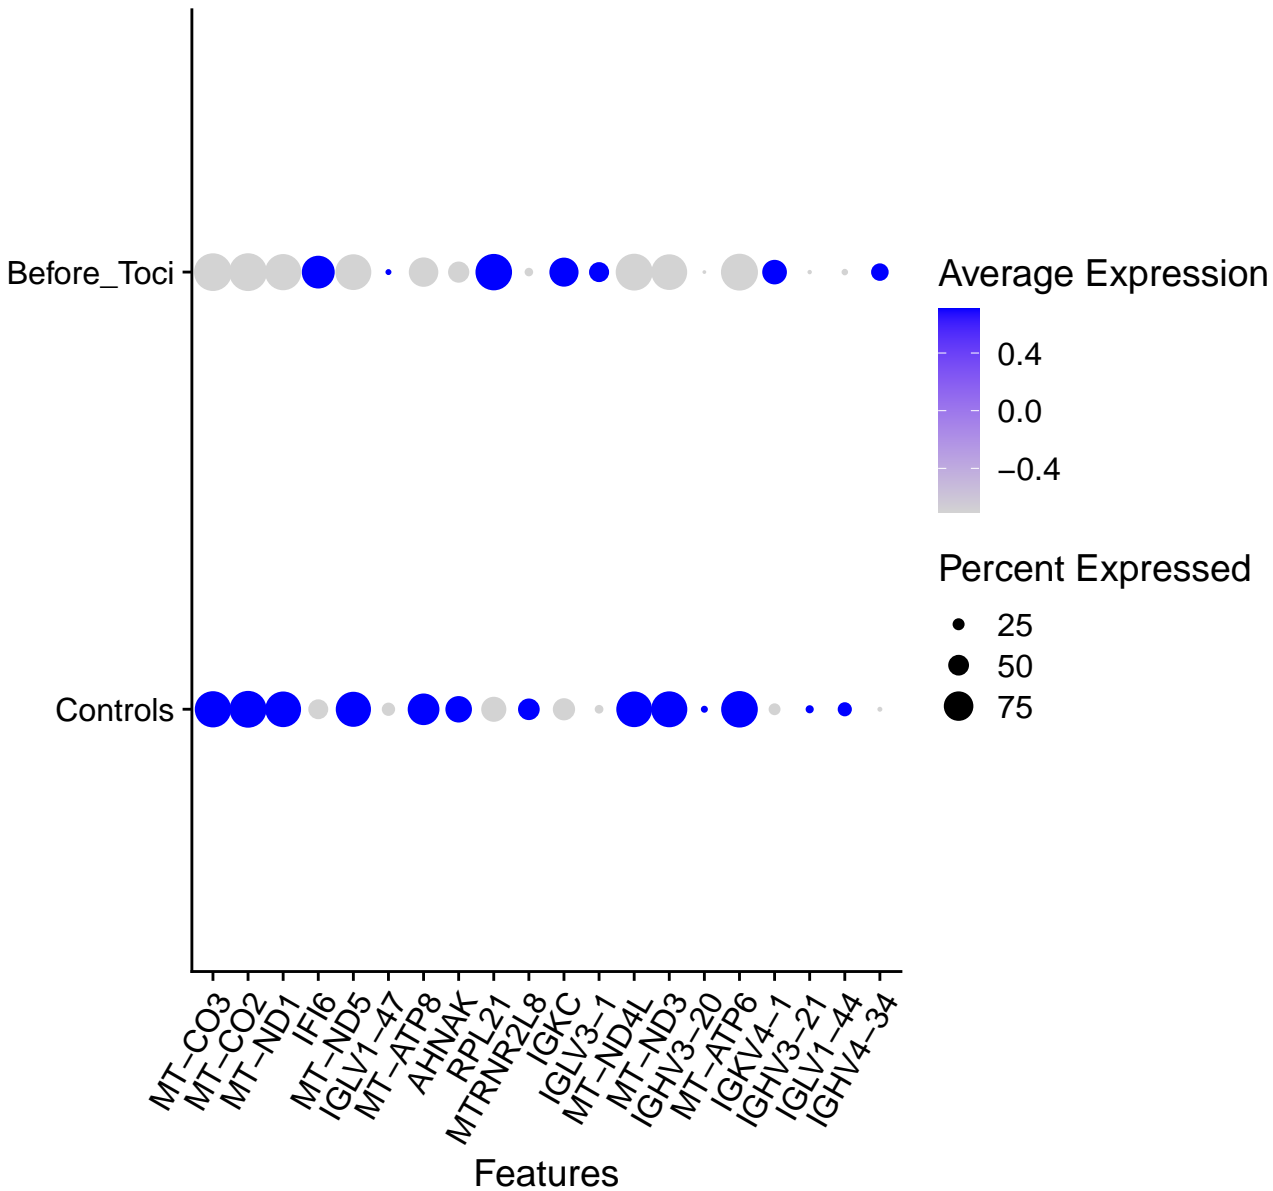

# Plasmacytoid DC

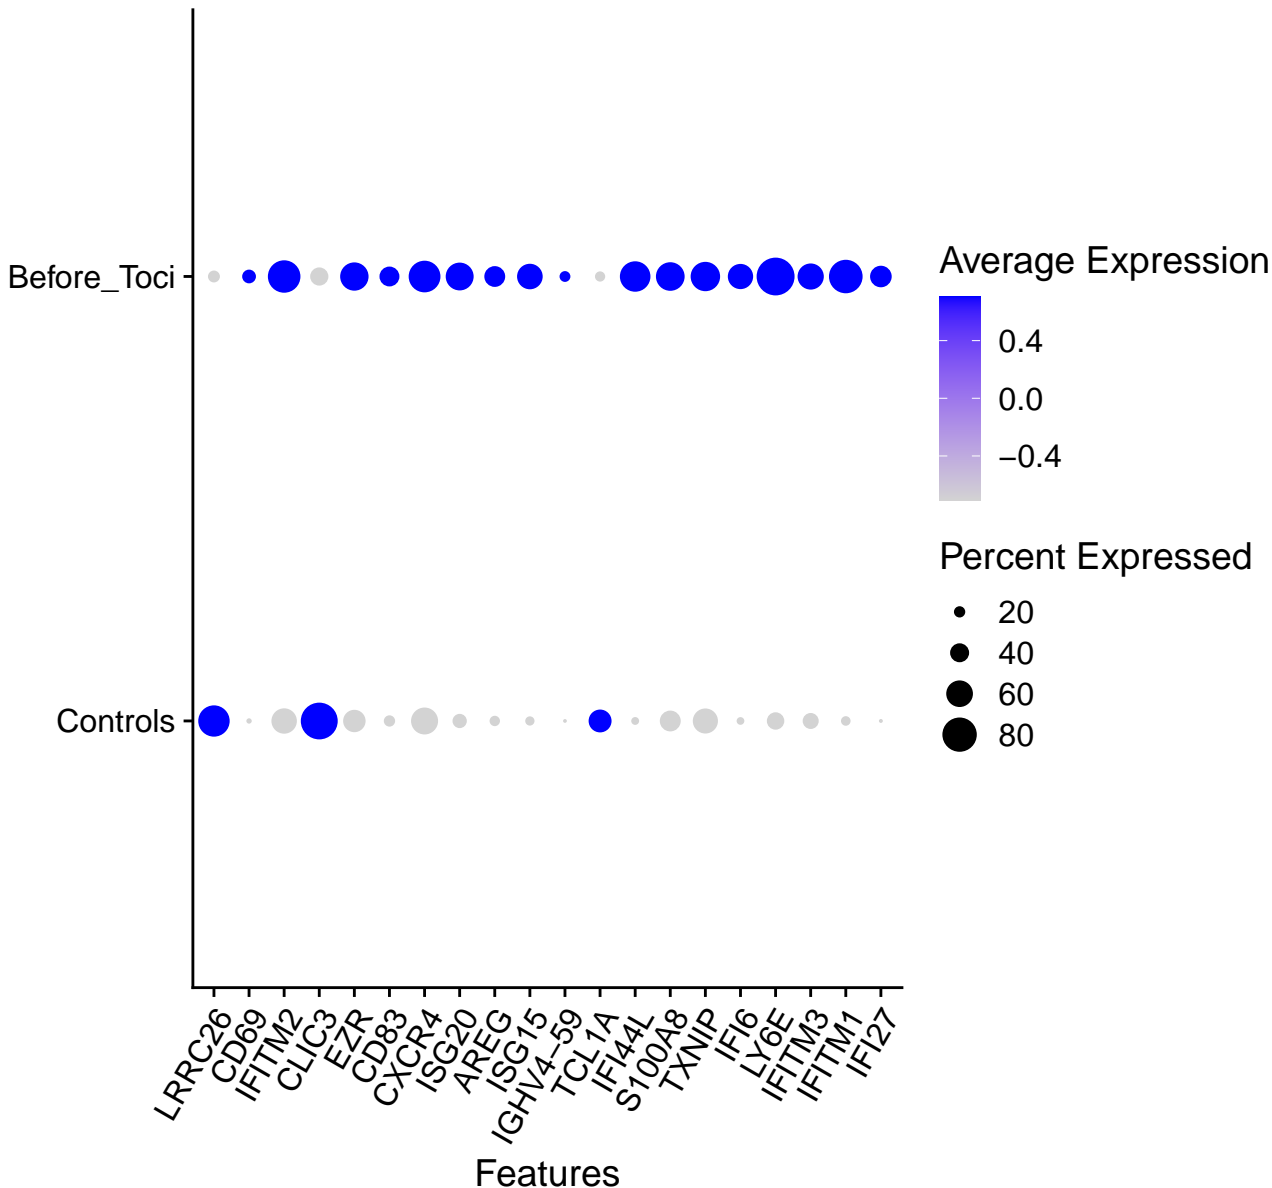

# Progenitor

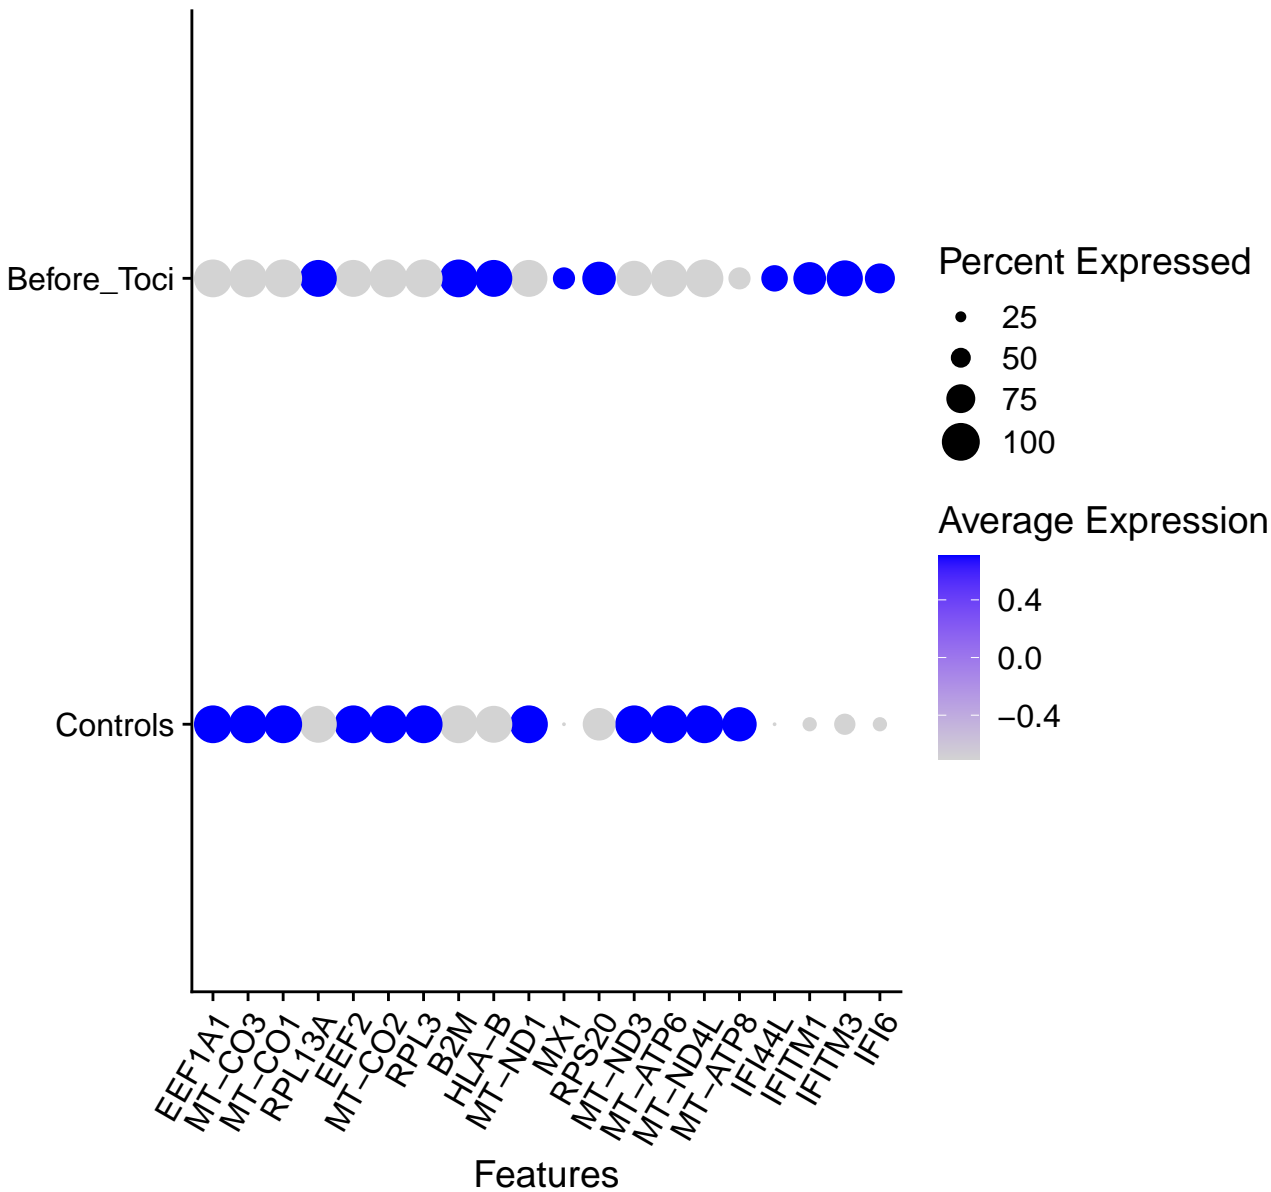

# IFN-activated CD8 T

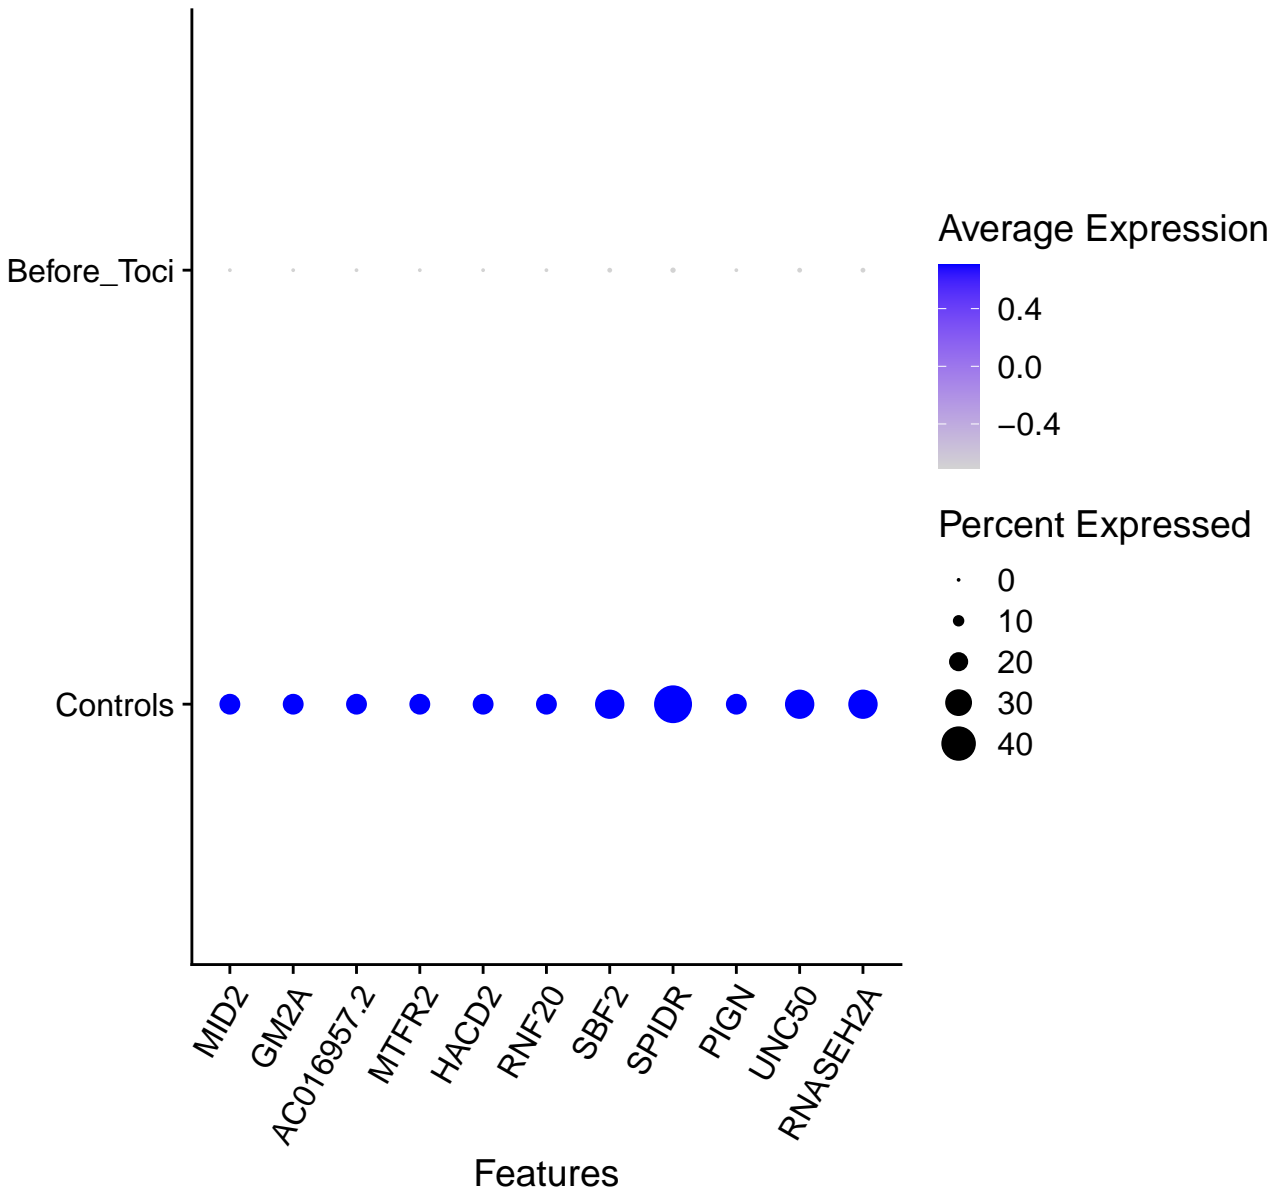

Supplement: Supplementary file [file 2020.07.16.20153437-6.pdf]
